1 **Structural insights into DNA sequence recognition by *Arabidopsis***  
2 **ETHYLENE RESPONSE FACTOR 96**

3 Chun-Yen Chen<sup>1</sup>, Pei-Hsuan Lin<sup>1</sup>, Kun-Hung Chen<sup>1</sup>, and Yi-Sheng Cheng<sup>1,2,3,\*</sup>

4 <sup>1</sup> Institute of Plant Biology, National Taiwan University, Taipei 10617, Taiwan

5 <sup>2</sup> Department of Life Science, National Taiwan University, Taipei 10617, Taiwan

6 <sup>3</sup> Genome and Systems Biology Degree Program, National Taiwan University, Taipei 10617,  
7 Taiwan

8 \*To whom correspondence should be addressed. Tel: +886-2-33663722; Email:

9 chengys@ntu.edu.tw

10 **ABSTRACT**

11 The phytohormone ethylene is widely involved in many developmental processes and is  
12 a crucial regulator of defense responses against biotic and abiotic stresses in plants.  
13 Ethylene-responsive element binding protein (EREBP), a member of the  
14 APETALA2/ethylene response factor (AP2/ERF) superfamily, is a transcription factor that  
15 regulates stress-responsive genes by recognizing a specific *cis*-acting element of target DNA.  
16 A previous study showed only the NMR structure of the AP2/ERF domain of AtERF100 in  
17 complex with a GCC box DNA motif. In this report, we determined the crystal structure of  
18 AtERF96 in complex with a GCC box at atomic resolution. We analyzed the binding residues  
19 of the conserved AP2/ERF domain in the DNA recognition sequence. In addition to the  
20 AP2/ERF domain, an N-terminal  $\alpha$ -helix of AtERF96 participates in DNA interaction in the  
21 flanking region. We also demonstrated the structure of AtERF96 EDLL motif, a unique  
22 conserved motif in the group IX of AP2/ERF family, is critical for the transactivation of  
23 defense-related genes. Our study establishes the structural basis of the AtERF96 transcription  
24 factor in complex with the GCC box, as well as the DNA binding mechanisms of the

1 N-terminal  $\alpha$ -helix and AP2/ERF domain.

## 2 INTRODUCTION

3 Plants are exposed to natural environments that may negatively affect their growth and  
4 development. To rapidly adapt to environmental change, numerous genes are regulated in  
5 response to biotic and abiotic stresses, such as herbivore damage, pathogenic infection, UV  
6 irradiation, temperature variation, drought, and high salt content (Ecker, 1995, Kazan, 2015,  
7 Mizoi, Shinozaki et al., 2012b, Penninckx, Eggermont et al., 1996, Penninckx, Thomma et al.,  
8 1998). These stresses can induce the biosynthesis of ethylene, a gaseous plant hormone  
9 confirmed as a mediator of plant stress responses (Ecker, 1995). A *cis*-acting element GCC  
10 box motif that constitutes the conserved sequence AGCCGCC is widely present in the  
11 promoter region of ethylene-inducible genes and has been suggested as a core sequence of the  
12 ethylene-responsive element (ERE) for ethylene signaling in plants (Buttner & Singh, 1997,  
13 Hao, Ohme-Takagi et al., 1998, Sessa, Meller et al., 1995, Xu, Narasimhan et al., 1998).

14 Such a group of transcription factors in plants is activated by ethylene signaling under  
15 biotic or abiotic stresses. APETALA2/ETHYLENE RESPONSE FACTORS (AP2/ERFs) are  
16 a superfamily of plant-exclusive transcription factors involved in the ethylene-inducible  
17 response (Gutterson & Reuber, 2004, Mizoi et al., 2012b). APETALA2 was first isolated  
18 from the floral development-related proteins in *Arabidopsis* (Jofuku, den Boer et al., 1994).  
19 Additionally, an AP2-LIKE ERE BINDING FACTOR (ERF), also known as ERE BINDING  
20 PROTEIN (EREBP), was first isolated as the GCC box-binding protein from tobacco  
21 (Ohme-Takagi & Shinshi, 1995). AP2/ERFs contain a highly conserved DNA-binding  
22 domain consisting of approximately 60 amino acids (Nakano, Suzuki et al., 2006),  
23 specifically to recognize the GCC box at the upstream operators of defense-related genes,  
24 such as pathogen-inducible *PLANT DEFENSIN 1.2* (*PDF1.2*) and  
25 *PATHOGENESIS-RELATED PROTEIN 4* (*PR4*) (Ohme-Takagi & Shinshi, 1995, Shinshi,

1 Usami et al., 1995). Therefore, AP2/ERFs play an important role in the regulation of defense  
2 responses in plants.

3 The AP2/ERF family has 147 members that can be divided into three subfamilies: AP2,  
4 RAV, and ERF (Nakano et al., 2006). The AP2 subfamily is composed of one or two AP2  
5 domains, which primarily participate in the process of floral development (Elliott, Betzner et  
6 al., 1996). The RAV subfamily contains an ERF domain and a B3 DNA-binding domain  
7 involved in ethylene and brassinosteroid responses (Hu, Wang et al., 2004). The largest ERF  
8 subfamily comprises 122 members and mainly involves an ERF domain that interacts with  
9 the GCC box DNA sequence (Hao et al., 1998). The ERF family can also recognize non-GCC  
10 box *cis* elements. For instance, the DEHYDRATION-RESPONSIVE ELEMENT BINDING  
11 PROTEINS (DREB1A and DREB2A) bind to the DRE box (5'-[A/G]CCGAC-3') of  
12 dehydration- and cold stress-related genes (Liu, Kasuga et al., 1998). AtERF13, RAP2.4, and  
13 RAP2.4L are involved in the abscisic acid (ABA) response by binding to the ABA-related  
14 *cis*-acting coupling element (CE1) upstream of the CE1 BINDING FACTOR (CEBF) in  
15 *Arabidopsis* (Lee, Park et al., 2010, Novillo, Medina et al., 2007). The ERF subfamily can be  
16 further divided into ten groups (groups I–X) based on sequence similarity. Among these,  
17 groups VIII and IX play an important role in the interaction between plant and pathogen  
18 (Nakano et al., 2006). The members of group IX-c, such as  
19 OCTADECANOID-RESPONSIVE AP2/ERF 59 (ORA59), TRANSCRIPTIONAL  
20 REGULATOR OF DEFENSE RESPONSE 1 (TDR1), AtERF14, AtERF15, as well as  
21 members of group IX-a, such as AtERF1 and AtERF13, positively regulate pathogen defense  
22 responses by recognizing the GCC box of defense-related genes basic chitinase (*Chi-B*) and  
23 *PDF1.2* (Berrocal-Lobo, Molina et al., 2002, Gutterson & Reuber, 2004, Onate-Sanchez,  
24 Anderson et al., 2007, Pre, Atallah et al., 2008, Zhang, Huang et al., 2015). Furthermore,  
25 group IX-c members of the AP2/ERF family interact with MEDIATOR25 (MED25) using a  
26 highly conserved sequence EDLL motif (also known as CMIX-1) at the C-terminus (Nakano

1 et al., 2006, Tiwari, Belachew et al., 2012). Yeast two-hybrid analysis revealed that AtERF98  
2 loses its binding function to MED25 when the conserved leucine is replaced by valine in the  
3 EDLL motif (Tiwari et al., 2012).

4 *Arabidopsis* ETHYLENE RESPONSE FACTOR 96 (AtERF96, AT5G43410), a member  
5 of ERF group IX, contains an AP2/ERF domain and an EDLL motif, and positively regulates  
6 defense responses against the necrotrophic pathogens *Botrytis cinerea* and *Pectobacterium*  
7 *carotovorum* (Catinot, Huang et al., 2015). Previous studies indicate that the expression level  
8 of AtERF96 can be induced via ethylene and jasmonate (JA) signaling pathways, but is  
9 antagonized by the salicylic acid (SA) response (Catinot et al., 2015, Zander, Thurow et al.,  
10 2014). The impact of TGACG SEQUENCE-SPECIFIC BINDING PROTEINS (TGA2,  
11 TGA5, TGA6) on AtERF96 mRNA levels has been confirmed (Zander et al., 2014).  
12 Additionally, microarray analysis revealed that 45% of the 126 up-regulated genes in  
13 transgenic overexpressing AtERF96 are strongly related to the plant defense response  
14 (Catinot et al., 2015).

15 To date, we lack a full-length protein structure of the AP2/ERF transcription factor.  
16 However, the GCC box-binding domain (GBD, namely, the AP2/ERF domain) of AtERF100  
17 (previously designated as ERF1 and renamed At4g17500 by Nakano *et al.*, 2006) was  
18 previously determined using nuclear magnetic resonance spectroscopy (NMR; PDB ID:  
19 1GCC) (Allen, Yamasaki et al., 1998). The AP2/ERF domain is composed of three  $\beta$ -sheets  
20 and an  $\alpha$ -helix; the  $\beta$ -sheets interact monomerically with the target 11 base pairs of  
21 double-strand DNA (5'-GCTAGCCGCCAGC-3'). Even if the classification of AP2/ERFs  
22 provides some information on their potential role in plants, only a limited number of  
23 AP2/ERF transcription factors have been functionally characterized. Here, we solved the  
24 crystal structure of the AtERF96–DNA complex, including an AP2/ERF domain and a unique  
25 EDLL motif. We determined the AtERF96–GCC11 binding mechanism, demonstrated that  
26 the N-terminal  $\alpha$ -helix of AtERF96 binds to the DNA minor groove, and clarified the

1 influence of AtERF96 on the target gene expression.

## 2 **MATERIALS AND METHODS**

### 3 **Cloning, expression, and purification of AtERF96**

4 The cDNA of full-length *Arabidopsis thaliana* *ERF96* (AT5G43410) was cloned into  
5 pET28a expression vector (Novagen) with a hexahistidine tag (6xHis-tag) at the N-terminus.  
6 The expression vector was transformed into *Escherichia coli* strain BL21 (DE3) (Novagen),  
7 and then incubated at 37°C in a 2 L flask with shaking until 0.4–0.6 absorbance at 600 nm  
8 was achieved. The expression of AtERF96 protein was induced by 0.1 mM isopropyl  
9  $\beta$ -D-1-thiogalactopyranoside (IPTG) for 18 h at 16°C. The cells were harvested by  
10 centrifugation at 9,820 g for 30 min at 4°C, then resuspended and lysed in lysis buffer (30  
11 mM HEPES pH 8.0, 500 mM NaCl, 20 mM imidazole, 0.5 mg/mL DNase I). The cells were  
12 lysed by sonication and the cell debris was removed via centrifugation at 18,900 g for 25 min  
13 at 4°C. Protein purification was performed by Fast Protein Liquid Chromatography (FPLC)  
14 using the AKTA prime plus system (GE Healthcare). The filtered supernatant was applied to a  
15 5 mL HisTrap<sup>TM</sup>FF column (GE Healthcare) pre-equilibrated with binding buffer (30 mM  
16 HEPES pH 8.0, 500 mM NaCl, 20 mM imidazole). Proteins were eluted with elution buffer  
17 (30 mM HEPES pH 8.0, 500 mM NaCl, 500 mM imidazole). The purified protein solution  
18 was applied to a HiTrap Heparin HP column (GE Healthcare) to remove endogenous DNA  
19 fragments of the host cells. The column was pre-equilibrated with buffer A (30 mM HEPES  
20 pH 8.0), and the protein was eluted using the linear gradient of buffer exchange from 0 to  
21 100% with buffer B (30 mM HEPES pH 8.0, 1 M NaCl). The eluted proteins were further  
22 desalted to storage buffer (30 mM HEPES pH 8.0, 250 mM NaCl, 10% glycerol) using a  
23 HiTrap<sup>TM</sup> Desalting column (GE Healthcare). Purified protein concentrations were  
24 determined at 595 nm absorbance using an ELISA reader (FlexStation 3, Molecular Devices)

1 and the standard curve method. The Coomassie brilliant blue G250 (CBB) protein assay  
2 solution (5x) (Bio-Rad) was used as the blank solution, and a dilution series of CBB mixed  
3 with 5  $\mu$ L bovine serum albumin (BSA) at 1000, 500, 250, and 125  $\mu$ g/mL were used as  
4 standards. The purified AtERF96 proteins were concentrated to 10 mg/ml using 10 kDa  
5 centrifuge tubes (Amicon Ultra-15 Centrifugal Filter; Merck Millipore) and stored at  $-80^{\circ}\text{C}$ .

## 6 **Site-directed mutagenesis**

7 The *AtERF96* single and double mutations were generated using the QuikChange  
8 Lightning Site-Directed Mutagenesis Kit (Agilent). The *AtERF96* mutations were introduced  
9 into cDNA fragments through PCR using the primers listed in Table S1, and the fragments  
10 were cloned into the pET28a expression vector. Protein expression and purification were  
11 performed as for wild-type ERF96.

## 12 **Preparation of fluorescein-labelled double-stranded DNA probes**

13 Individual single-stranded oligonucleotides of GCC-box fragments were synthesized by  
14 commercial gene synthesis (Genomics). The 5' end of forwarding oligonucleotides were  
15 labeled with fluorescein. Annealing of the two complementary strands was performed in 30  
16 mM HEPES (pH 7.4) by heating at  $95^{\circ}\text{C}$  for 1 min, followed by slowly cooling to room  
17 temperature for 20 min. The concentration of the annealed DNA probes was measured by  
18 spectrophotometry (DS-11, DeNovix) and stored at  $-20^{\circ}\text{C}$ .

## 19 **Size-exclusion chromatography (SEC)**

20 The SEC column was pre-equilibrated with one column volume of GF1 buffer (30 mM  
21 HEPES pH 8.0, 500 mM NaCl, 10% glycerol). To determine the molecular weight of the  
22 target protein, 300  $\mu$ L of protein standard (Bio-Rad) containing  $\gamma$ -globulin (bovine, 158 kDa),  
23 ovalbumin (chicken, 44 kDa), myoglobin (horse, 17 kDa), and vitamin B12 (1.35 kDa) was

1 applied to the column, and the elution volumes of the standards were plotted against the  
2 logarithm of the standards' molecular weights.

3 The polymer characterization of AtERF96 proteins was performed by the AKTA prime  
4 plus system (GE Healthcare) using a Superdex 75 column (GE Healthcare). The AtERF96  
5 protein sample (< 5 mL volume) was applied to the column, and the fractions of elution peaks,  
6 including monomeric AtERF96 proteins, were pooled and concentrated to 10 mg/ml using a  
7 10 kDa centrifuge tube.

8 The binding analysis of ERF96–GCC-box was performed by the AKTA prime plus  
9 system (GE Healthcare) using a Superdex 75 column (GE Healthcare). A mixture of  
10 AtERF96 protein and double-stranded GCC12 DNA fragments were pre-incubated on ice at a  
11 1:2 molar ratio for 30 min. The AtERF96 protein, double-stranded GCC12 DNA fragments,  
12 and the ERF96–GCC12 complex were applied to the column with GF2 buffer (30 mM  
13 HEPES pH 8.0, 62.5 mM NaCl, 10% glycerol). The fractions of each elution peak were  
14 pooled and concentrated to 10 mg/ml using a 10 kDa centrifuge tube.

### 15 **Fluorescein-based electrophoretic mobility shift assay (fEMSA)**

16 The fluorescein-labeled probes and AtERF96 recombinant proteins were incubated in 30  
17 mM HEPES (pH 7.4), 62.5 mM NaCl, and 5% glycerol for 30 min at room temperature in the  
18 dark. A 10% polyacrylamide gel was pre-run at 120 V for 40 min at 4°C. Samples were  
19 mixed with 5x loading dye and run at 120 V for 90 min at 4°C in the dark. The gel was  
20 scanned for fluorescent band shift using the FluorChem™ M system (ProteinSimple) and a  
21 luminescence imaging system (Fuji LAS-3000). Quantitative analysis of fluorescent band  
22 shift was performed using ImageJ software, with the band intensity of the AtERF96-GCC box  
23 set as a baseline (100%) to determine the relative binding level.

## 1 **Dynamic light scattering (DLS) assay**

2 The purified AtERF96 protein sample (20  $\mu\text{L}$  at 1 mg/mL) was loaded into the cuvette,  
3 and the particles of the protein molecules in the solutions were measured at 25°C. The batch  
4 light scattering data were recorded using the DynaPro Plate Reader I (Wyatt Technology) and  
5 analyzed with DYNAMICS 7.0 software (Wyatt Technology). The diffusion coefficient was  
6 calculated from the intensities of light scatter from the molecule particles, and further  
7 analysis of the hydrodynamic radius, diameters, and molecular weights of the target protein  
8 particles by the Stokes-Einstein Law is described as follows:

$$D = \frac{k_B T}{6\pi\eta r}$$

9 where  $D$  is the diffusion constant ( $\text{m}^2/\text{s}$ ),  $k_B$  is Boltzmann constant,  $T$  is the absolute  
10 temperature,  $\pi$  is the ratio of a circle's circumference to its diameter,  $\eta$  is the dynamic  
11 viscosity, and  $r$  is the radius of the spherical particle.

## 12 **Fluorescence polarization (FP) assay**

13 Purified AtERF96 proteins were desalted to FP buffer (30 mM HEPES pH 7.4, 250 mM  
14 NaCl, 10% glycerol) using a HiTrap™ Desalting column (GE Healthcare), and the  
15 concentration was determined by the Bradford protein assay. The AtERF96 protein samples  
16 were two-fold serially diluted in FP butter to 16 or 24 concentrations, and 50  $\mu\text{L}$  of each  
17 diluted protein sample was added to a 96-well plate, along with 50  $\mu\text{L}$  of 20 nM GCC12  
18 probes in each sample well. A set of wells containing 100  $\mu\text{L}$  FP buffer, and another set of  
19 wells containing 50  $\mu\text{L}$  FP buffer mixed with 50  $\mu\text{L}$  of 20 nM GCC12 probes were used as  
20 blanks and controls, respectively. FP enables the study of molecular interactions by  
21 monitoring changes in the apparent size of fluorescently-labelled or inherently fluorescent  
22 molecules, which are often referred to as the tracer or the ligand (Checovich, Bolger et al.,  
23 1995, Heyduk, Ma et al., 1996, Moerke, 2009). The samples of fluorescent molecules were



1 excited by plane-polarized light, and the emission spectra were recorded and analyzed by  
2 PARADIGM™ (Beckman Coulter/Molecular Devices). Quantification of fluorescence  
3 polarization (FP) is defined as the difference between the emission intensities of horizontally  
4 ( $F_{\parallel}$ ) and perpendicularly polarized light ( $F_{\perp}$ ) to the excitation light plane normalized by the  
5 total fluorescence emission intensity (Moerke, 2009). The formula of FP is described as  
6 follows:

$$P = \frac{F_{\parallel} - F_{\perp}}{F_{\parallel} + F_{\perp}}$$

7 where P is the polarization obtained by subtracting the blank value of both the horizontally  
8 and perpendicularly polarized light. The anisotropic levels of polarized fluorescence were  
9 plotted against the concentrations of protein samples using Prism 7 (GraphPad Software, Inc.)  
10 with the two-site binding equation. The dissociation constant ( $K_d$ ) is determined by the  
11 correlation between polarizations and sample concentrations, and the formula of two-site  
12 binding is described as follows:

$$y = \frac{B_{\max\text{Hi}} \times x}{K_{d\text{Hi}} + x} + \frac{B_{\max\text{Lo}} \times x}{K_{d\text{Lo}} + x}$$

13 where  $x$  is the protein concentration,  $y$  is the polarized value.  $B_{\max\text{Hi}}$  and  $B_{\max\text{Lo}}$  are the  
14 maximum specific bindings to the two sites in the same units as  $y$ .  $K_{d\text{Hi}}$  and  $K_{d\text{Lo}}$  are the  
15 equilibrium binding constants, in the same units as  $x$ .

## 16 **Protoplast transactivation analysis (PTA)**

17 The experimental procedure is described in a previous report (Yoo, Cho et al., 2007).  
18 Wild-type *Arabidopsis* plants were grown on sterile soil in an environment-controlled  
19 chamber. True leaves number 5–7 from 4-week-old plants were chosen before flowering and  
20 1-mm leaf strips were cut from the middle part of a leaf. Leaf strips were quickly and gently  
21 transferred into the prepared enzyme solution (20 mM 2-(N-morpholino) ethanesulfonic acid

1 (MES) pH 5.7, 1.5% (w/v) cellulase R10, 0.4% (w/v) macerozyme R10, 0.4 M mannitol, 20  
2 mM KCl). To enhance enzyme solubility, the solution was heated at 55°C for 10 min to  
3 inactivate DNase and proteases. While the solution was cooling to room temperature (25°C),  
4 10 mM CaCl<sub>2</sub>, 1 mM β-mercaptoethanol, and 0.1% BSA were added. Leaf strips were  
5 vacuum-infiltrated for 30 min in the dark using a desiccator, then the digestion was continued  
6 in the dark at room temperature for at least 3 h. The enzyme/protoplast solution was diluted  
7 with an equal volume of W5 solution (2 mM MES pH 5.7, 154 mM NaCl, 125 mM CaCl<sub>2</sub>, 5  
8 mM KCl) before filtration to remove undigested leaf tissues. The enzyme/protoplast solution  
9 was filtered using 75-μm nylon mesh wetted with W5 solution, centrifuged at 200 g for 2 min  
10 to pellet the protoplasts, then the supernatant was removed and the pellet was re-suspended in  
11 W5 solution with gentle swirling. Protoplasts were centrifuged again for 15 min to remove  
12 W5 solution, and the protoplast pellet was re-suspended with MMG solution (4 mM MES pH  
13 5.7, 0.4 M mannitol, 15 mM MgCl<sub>2</sub>) at room temperature. Ten μl of DNA plasmids and 100  
14 μl of protoplasts were gently mixed in the microfuge tube. Then, 110 μl polyethylene glycol  
15 (PEG) solution (40% (w/v) PEG4000, 0.2 M mannitol, 100 mM CaCl<sub>2</sub>) was added and mixed  
16 gently, and the transfection mixture was incubated at room temperature for 10 min. The  
17 transfection was stopped by diluting the mixture with 400 μl W5 solution and gentle mixing.  
18 The protoplast mixture was centrifuged at 100 g for 2 min to remove the supernatant and  
19 re-suspended gently with 1 ml WI solution (4 mM MES pH 5.7, 0.5 M mannitol, 20 mM  
20 KCl). Protoplasts were transferred to a tissue culture plate and incubated at room temperature  
21 for 8 h, then re-suspended and harvested by centrifugation at 100 g for 2 min to remove the  
22 supernatant. Protoplast lysis buffer (100 μl) was added to the protoplasts and mixed  
23 vigorously by vortexing for 10 s, then incubated on ice for 5 min and centrifuged at 1000 g  
24 for 2 min. Twenty μl of lysate was added to 100 μl luciferase mix (Dual-Luciferase<sup>®</sup> Reporter  
25 Assay System, Promega), and the luciferase activity was measured with a luminometer  
26 (Infinite M200 pro, TECAN).

## 1 **Protein crystallization and data collection**

2 The AtERF96 protein and GCC11 double-stranded DNA probe (5'-TAGCCGCCAGC-3')  
3 were incubated in a tube at a 1:2 molar ratio, and concentrated to 6 mg/mL with GF2 buffer  
4 for crystallization. Screening for suitable crystallization conditions was performed using the  
5 Crystal Phoenix Liquid Handling System robot (Art Robbins Instruments, LLC). The  
6 program was set to a sitting-drop method, which dispensed an equal volume of the protein–  
7 DNA mixture and screening buffer to a volume of 1  $\mu$ L to each well of a 96-well plate. The  
8 AtERF96–GCC11 complex crystals were observed at a temperature of 295 K at four  
9 crystallization conditions: Natrix<sup>TM</sup> No. 45 (0.05 M Tris-HCl pH 8.5, 0.025 M MgSO<sub>4</sub>·H<sub>2</sub>O,  
10 1.8 M (NH<sub>4</sub>)<sub>2</sub>SO<sub>4</sub>), Natrix<sup>TM</sup> 2 No. 6 (0.05 M sodium cacodylate trihydrate pH 6.0, 35%  
11 tacsimate pH 6.0), Natrix<sup>TM</sup> 2 No. 26 (0.05 M 3-(N-morpholino)propanesulfonic acid (MOPS)  
12 pH 7.0, 0.02 M MgCl<sub>2</sub>·6H<sub>2</sub>O, 55% tacsimate pH 7.0), and PEGRx<sup>TM</sup> 2 No. 6 (0.1 M sodium  
13 citrate tribasic dihydrate pH 5.0, 10% (v/v) 2-propanol, 26% (v/v) PEG 400; Hampton  
14 Research, Inc.). Crystals grew to a suitable size for X-ray diffraction after six months. All  
15 diffraction data were collected at 100 K on beamline 13C1 at the National Synchrotron  
16 Radiation Research Center (NSRRC), Hsinchu, Taiwan. Diffraction data were recorded using  
17 the ADSC Quantum-315r CCD detector and collected using Blu-Ice software (McPhillips,  
18 McPhillips et al., 2002).

## 19 **Structure determination and refinement**

20 Diffraction data were indexed, integrated, and scaled using the HKL2000 package  
21 (Otwinowski & Minor, 1997). The crystallographic structure was solved by the PHENIX  
22 platform (Adams, Afonine et al., 2010). The assessment of data quality was analyzed by the  
23 phenix.xtriage program. Data from the crystal that grew in Natrix<sup>TM</sup> 2 No. 6 had the best  
24 diffraction quality, and the resolution limit reached 1.76 Å. The AtERF96–GCC11 complex

1 was co-crystallized in space group  $P1\ 2_1\ 1$ , which comprised of one AtERF96 and one  
2 GCC11 DNA fragment in an asymmetric unit. Twinning analysis by the phenix.xtriage  
3 program showed that the data consists of five pseudo-merohedral twins with 3-fold axes (-h-l,  
4 k, h/ l, k, -h-l) and 2-fold axes (l, -k, h/ h, -k, -h-l/ -h-l, -k, l). The structure of the AtERF96–  
5 GCC11 complex was solved by the molecular replacement method with Phaser (McCoy,  
6 Grosse-Kunstleve et al., 2007), using the structure of the AtERF100 AP2/ERF domain  
7 (K144-V206) (Protein Data Bank [PDB] ID: 1GCC) (Allen et al., 1998) as a template model.  
8 The unknown region of the AtERF96 structure was built manually using COOT software,  
9 according to the  $F_o-F_c$  electron density map. The resulting electron density map was  
10 sharpened by density modification using RESOLVE (Afonine, Grosse-Kunstleve et al., 2012).  
11 Refinement was continued with several cycles of positional, B-factor, occupancies, and TLS  
12 (Translation-Libration-Screw-rotation) refinement. Data was detwinned against the twin  
13 operators by phenix.xtriage, and further improvement of the density map was achieved by  
14 using the twin fraction refinement by REFMAC5 of the CCP4 platform (Murshudov, Skubak  
15 et al., 2011, Winn, Ballard et al., 2011) to filter out those small twin fractions so that the  
16 major twin domain remains. The revised structure factor data was refined again by  
17 phenix.refine, using new R-free flag for several cycles. Validation was performed by the  
18 MolProbity program (Chen, Arendall et al., 2010) to check the real-space correlation,  
19 molecular geometry, and Ramachandran plots. The stereochemistry of AtERF96 revealed  
20 Ramachandran outliers at 4.7%, including Phe71, Pro72, Val81, Gln103, Val104, and Val114.  
21 Many Ramachandran outliers were caused by the weak electron density in disordered regions.  
22 All structural models were generated using PyMOL (Schrödinger, LLC).

### 23 **Data availability**

24 Atomic coordinates and structure factors for the reported crystal structures have been  
25 deposited with the Protein Data Bank under accession number 5WX9.

1

## 2 **RESULTS**

### 3 **AtERF96 recognizes the core sequence of the GCC box motif**

4       The full-length AtERF96 protein consists of 131 amino acids. We constructed and  
5 expressed a series of AtERF96 proteins, including wild-type and different mutants, in an *E.*  
6 *coli* system, and purified these using fast protein liquid chromatography (FPLC). Two elution  
7 peaks of the AtERF96 protein from the size-exclusion chromatography (SEC) analysis were  
8 determined at approximately 286.5 and 26.7 kDa (Fig. S1A). However, the molecular weight  
9 of the AtERF96 protein ranges between 15 and 20 kDa based on SDS-PAGE (Fig. S1B). We  
10 used dynamic light scattering (DLS) to further confirm protein homogeneity and the size  
11 distribution profile. The results showed that the precise monomeric form (62.7 mL) was 17  
12 kDa, which is consistent with the results of the SDS-PAGE analysis (Fig. S1D and E).

13       The AtERF family widely regulates defense-related genes by recognizing the GC-rich  
14 sequences at the upstream promoter. Hence, we designed the SEC experiments to clarify  
15 whether the AtERF96 protein interacts with the GCC box motif. An earlier elution volume of  
16 the SEC trace indicated that the AtERF96 protein interacts with the GCC12 DNA probe  
17 composed of 12 base pairs (Fig. 1A). To determine whether the length of the GCC box  
18 sequence influences the binding ability of AtERF96, we designed different lengths of GCC  
19 probes comprised of a core sequence and a variable flanking region according to the GC-rich  
20 promoter sequence in *Arabidopsis* (Table S2). Fluorescence-based electrophoretic mobility  
21 shift assay (fEMSA) analysis showed that all GCC probes bound to the AtERF96 protein,  
22 especially GCC11 and GCC12 (Fig. 1B). Therefore, we co-crystallized AtERF96 with the  
23 GCC11 DNA site and determined the structure to a resolution of 1.76 Å with final  $R_{\text{work}}/R_{\text{free}}$   
24 values of 20.7%/22.7% (Fig. S1C, Table 1).

## 1 **Crystal structure of the AtERF96–GCC11 complex**

2       The complex structure consists of the AtERF96 protein with all 131 amino acids, and a  
3 double-stranded GCC box motif with 11 base pairs (Fig. 1C). The AtERF96 structure is  
4 composed of five  $\alpha$ -helices and three  $\beta$ -sheets, including an AP2/ERF domain (K14–E74,  $\beta$ 1–  
5  $\beta$ 3) for target gene recognition, as well as an EDLL motif (F105–L119,  $\alpha$ 5) for transcriptional  
6 activation. The three-stranded antiparallel  $\beta$ -sheet fragment of the AP2/ERF domain binds to  
7 the GCC11 motif and crosses the adjacent major groove region. We found that AtERF96 and  
8 AtERF100 could be superimposed with a backbone root-mean-square deviation of 1.31 Å  
9 across 55 C $\alpha$  atoms in the AP2/ERF domain (Fig. S2). The front of the AP2/ERF domain is  
10 the N-terminal  $\alpha$ -helix (M1–G9,  $\alpha$ 1), which docks into the minor groove of the GCC11 motif.  
11 A linker consisting of eight residues (A10–G17) connects the  $\alpha$ 1 helix and  $\beta$ 1 sheet, gripping  
12 one strand of the DNA double helix between the  $\alpha$ 1 helix and the  $\beta$ 1 sheet of the AP2/ERF  
13 domain (Fig. 1C). Extending from the AP2/ERF domain, three  $\alpha$ -helices ( $\alpha$ 3– $\alpha$ 5), including  
14 an EDLL motif, constitute the C-terminal region (Y75–K131) in a triangular-shaped  
15 architectural design. Most residues of the AP2/ERF domain have a positively charged electric  
16 potential and are highly conserved in group IX of the AP2/ERF family (Fig. 2A, Fig. S3). The  
17 AP2/ERF domain consists of several arginines in the three-stranded antiparallel  $\beta$ -sheets  
18 bound to the thymines or guanines of the GCC box, which generates a protein-DNA binding  
19 network (Fig. 2B, Table S3). Residues R16, R31, and R39 of the AP2/ERF domain interact  
20 with the phosphate group of base G15, as well as the guanine group of bases G6, G15, and  
21 G16 (Fig. 2C). Residues R19 and R21 interact with bases T1, G3, G18, and G19 of the  
22 GCC11 motif at the adjacent interface (Fig. 2D). Furthermore, the conserved tryptophans  
23 W23 and W41 provide hydrophobic interactions to stabilize nucleobases T1, G3, and C4 of  
24 the GCC11 motif (Fig. 2E). We observed that residues D2, Q3 and R6 of the N-terminal  $\alpha$ 1  
25 helix bind to nucleotides G10, C11, and T14 of the GCC11 motif and partially disturb the

1 interactions of DNA base pairs in the 3' flanking region (Fig. 2F). We therefore analyzed the  
2 nucleic acid structure of AtERF96-GCC11 using the w3DNA server (Zheng, Lu et al., 2009).  
3 The conformational analysis indicated that the GCC11 structure shows an obvious shift and  
4 twist in the base step C7/C8, as well as a large tilt and roll in the base step T14/G15 (Table  
5 S4). The parameters imply hydrogen bond disruption of DNA base pairs C8-G15 and A9-T14  
6 (Table S5 and S6). The results suggest that the AtERF96 protein specifically binds the GCC  
7 box core sequence through the AP2/ERF domain, and also connects the N-terminal  $\alpha$ 1 helix  
8 to these interactions by binding to the 3' flanking region of GCC11.

### 9 **Effect of mutations on the AtERF96–GCC box interaction**

10 In view of the structural information about the AtERF96–GCC box complex, we  
11 investigated the importance of conserved residues in the AP2/ERF domain of AtERF96 for  
12 GCC box binding. We present a series of AtERF96 mutants corresponding to the binding  
13 residues of the structural data and analyzed the dissociation constant ( $K_d$ ) with a fluorescently  
14 labeled GCC box probe using a fluorescence polarization (FP) assay (Fig. 3A). We chose the  
15 GCC12 probe to perform the analysis due to its significant binding shift in the fEMSA assay  
16 (Fig. 1B). The results showed that the curves of concentration-dependent polarization fit two  
17 sites binding with two independent  $K_d$  values ( $K_{dHi}$  and  $K_{dLo}$ ) (Table S7). AtERF96 mutants  
18 had a significant reduction in the binding ability of R16A, R19A, R21A, R39A, and R41A to  
19 the GCC12 probes (Fig. 3, Table S7). All of above mutants showed raised levels of  $K_{dHi}$  value,  
20 implying that these residues are necessary for specific binding in the GCC box. Except for the  
21 R16A, W23A, and double-mutant proteins, most mutants remained roughly at the same level  
22 of  $K_{dLo}$  relative to the wild-type (Fig. 3, Table S7). The raised  $K_{dLo}$  levels of R16A and W23A  
23 reflected that these residues are involved in non-specific binding in the GCC box, including  
24 the  $\pi$ - $\pi$  stacking of the indole ring and phosphate group binding (Fig. 2C and E). The  
25 R19A/R21A and R31A/R39A mutants showed a severe interference in the binding to the

1 GCC12 probes (Fig. 3J and K, Table S7), indicating that these double mutants nearly lost  
2 their ability to recognize the core sequence. We noticed that the values of  $K_{dHi}$  in the R39A,  
3 R19A/R21A, and R31A/R39A mutants were approximately equal to the  $K_{dLo}$  values (Fig. 3J  
4 and K). Thus, we further analyzed all the polarization data using the equation of one-site  
5 binding. The results showed that the polarized curves of R19A, R21A, R39A, W41A and  
6 double mutants could be also fitted by the one-site binding (Fig. S4). In addition, R39A,  
7 R19A/R21A, and R31A/R39A mutants revealed the similar  $K_d$  value to the  $K_{dHi}$  and  $K_{dLo}$ ,  
8 respectively (Fig. S4G, I, and J, Table S7). This indicates that the binding specificity of these  
9 mutants was weakened as the features of two-site binding became insignificant. We also  
10 performed a fEMSA assay to verify the binding ability of various AtERF96 mutants with  
11 different lengths of the GCC box probe. Irrespective of the GCC box probe length used, the  
12 binding affinities of the R19A, R21A, R31A, R39A, and W41A mutants were severely  
13 decreased (Fig. S5 and S6). The R16A mutant showed minor affinities with the shorter GCC8  
14 and GCC10 probes (Fig. S5A and B), whereas the R19A/R21A and R31A/R39A double  
15 mutants barely had the ability to bind any probes (Fig. S7A). Similar to the results of the FP  
16 analysis, the W23A mutant showed a lower binding ability with the GCC8, GCC11, and  
17 GCC15 probes, and the W41A mutant revealed a more severely reduced interaction with all  
18 of the GCC probes (Fig. S5 and S6). We further investigated the importance of AtERF96  
19 N-terminus in GCC box binding, and designed a series of AtERF96 mutants in view of the  
20 probable DNA-binding residues in the  $\alpha 1$  helix (Fig. 4A). All N-terminal mutants had limited  
21 influence on  $K_{dHi}$  levels, except for the N-terminal truncated protein (Fig. 4B–F). However,  
22 the  $K_{dLo}$  levels of D2A/Q3A/R6A and ND10 significantly increased (Fig. 4E and F, Table S7).  
23 The results indicate that the residues in the  $\alpha 1$  helix are involved in non-specific binding.  
24 Overall, most of the conserved arginines and tryptophans in the AP2/ERF domain of the  
25 AtERF96 protein are crucial for recognizing the GCC box motif.



## 1 **Protoplast transactivation analysis**

2 Our structural data showed that both the AP2/ERF domain and the N-terminal region of  
3 AtERF96 interact with the GCC box motif (Fig. 2E). We compared two GCC box motifs of  
4 the AtERF96–GCC11 and AtERF100–GCC11 complexes (Fig. 5A and B) and noticed that  
5 the  $\alpha 1$  helix (M1-G9) of AtERF96 binds to the flanking region of the GCC11 DNA motif (Fig.  
6 2E). The  $\alpha 1$  helix contacts the template strand of the GCC box in the 5' end region, resulting  
7 in a conformational change of the template strand and slight flipping of the ten nucleotide  
8 base pairs from C7 to G16 (Fig. 5C and D). In view of the N-terminal region of AtERF96  
9 altering the DNA architecture of GCC11 in the crystals, we performed a transactivation  
10 analysis in AtERF96-overexpressing protoplasts to investigate whether the N-terminal region  
11 of AtERF96 is involved in transcription regulation. A luciferase (LUC)-encoding reporter  
12 gene, *PDF1.2 pro:LUC*, which contains two copies of the GCC box sequence from the  
13 *PDF1.2* promoter, and an effector plasmid consisting of each *AtERF* under the control of the  
14 cauliflower mosaic virus (CaMV) 35S promoter, were co-infiltrated into the *Arabidopsis*  
15 protoplasts (Fig. 6A). The results showed that LUC activity was not affected by the  
16 N-terminal-mutated or N-terminal-truncated AtERF96 proteins. However, decreased LUC  
17 activity was detected when the reporter plasmids were coexpressed with the effector plasmids  
18 of the AtERF96 R6A mutant (Fig. 6B). The data indicate that the N-terminal region of  
19 AtERF96 has a minor effect on transcription of the target gene. By contrast, the LUC  
20 activities affected by the AP2/ERF domain mutants of the AtERF96 effector plasmids were  
21 significantly reduced (Fig. 6C). These data coincide with the results of the binding between  
22 the AtERF96 mutants and the GCC box probes from the FP analysis. Coexpression of the  
23 EDLL-truncated AtERF96 with the reporter construct resulted in significant LUC inactivation  
24 (Fig. 6C). The mutants W23A and W41A showed a reduced binding ability to the GCC box in  
25 the transactivation assay, consistent with the results of the FP analysis and fEMSA (Fig. 3, S5

1 and S6). Furthermore, we observed two regions of the EDLL motif with high B-factor  
2 distributions, including the residues G80 to S84 and V104 to Y109 (Fig. 6D) (Çevik, Kidd et  
3 al., 2012, Tiwari et al., 2012). The sequence alignment showed that glutamate, aspartate, and  
4 leucine are enriched and highly conserved in the EDLL motif of group IX of the AP2/ERF  
5 family (Fig. 6E, Fig. S3). The results suggest that the EDLL motif is necessary for AtERF96  
6 to interact with MED25, a subunit of the mediator complex in *Arabidopsis*.

### 7 **DNA binding specificity of AtERF96**

8 To determine whether AtERF96 proteins interact with non-GCC box motifs, we tested  
9 three DNA motifs with GC-rich sequences: P box, CS1 box, and DRE box (A/GCCGAC)  
10 (Hao, Yamasaki et al., 2002). We designed these three probes with fluorescein fused to the 5'-  
11 or 3'-end and tested the binding ability between AtERF96 proteins and these DNA motifs  
12 using fEMSA and FP analyses. The GCC12 probe and the W box (TTGACC) probe were  
13 used as positive and negative controls for fEMSA analysis, respectively. (Fig. S7B). The  
14 fEMSA results showed that AtERF96 protein has a slight binding ability to P box, CS1 box,  
15 and DRE box motifs (Fig. 7A). The FP assay also revealed that the  $K_{dHi}$  levels of these motifs  
16 to AtERF96 protein were much weaker than the GCC box by 8 to 25 fold, respectively (Fig.  
17 7B–D, Table S8). By contrast, the influence of the  $K_{dLo}$  levels on the P box and DRE box  
18 motifs was insignificant (Table S8). These data suggest that the AtERF96 protein retains a  
19 limited binding ability for other DNA motifs through non-specific interactions.

### 20 **DISCUSSION**

21 AP2/ERF-family proteins regulate transcription by recognizing the GCC box sequence  
22 in the promoters of target genes (Mizoi, Shinozaki et al., 2012a). Group IX of the AP2/ERF  
23 family is composed of three subgroups, IX-a, IX-b, and IX-c, characterized by the conserved  
24 motifs (CM) CMIX-3, CMIX-2, and CMIX-1 (specifically, the EDLL motif), respectively

1 (Nakano et al., 2006). Among these, the members of group IX of AP2/ERFs have been linked  
2 to defensive gene expression in response to pathogen infection (Berrocal-Lobo et al., 2002,  
3 Gu, Wildermuth et al., 2002, Gutterson & Reuber, 2004). AtERF96 phylogenetically belongs  
4 to group IX-c of the AP2/ERF gene family. The amino acid sequence of AtERF96 is similar  
5 to that of AtERF95, AtERF97, and AtERF98, and is relatively smaller than that of the other  
6 members of group IX. Recently, Catinot and colleagues showed that overexpressed *AtERF96*  
7 enhances *Arabidopsis* resistance to necrotrophic pathogens, such as the fungus *Botrytis*  
8 *cinerea* and the bacterium *Pectobacterium carotovorum* (Catinot et al., 2015). A microarray  
9 assay coupled to chromatin immunoprecipitation-PCR of overexpressed AtERF96 revealed  
10 that AtERF96 regulates the activation of JA/ET-responsive genes, such as *PDF1.2a*, *PR-3*,  
11 and *PR-4*, as well as the transcription factor ORA59, through direct binding to existing GCC  
12 elements in their promoters (Berrocal-Lobo et al., 2002, Catinot et al., 2015, Pre et al., 2008).

13 In this study, we determined the crystal structure of the AtERF96–GCC11 complex,  
14 including an AP2/ERF domain and an EDLL motif at a resolution of 1.76 Å (Fig. 1C, Table  
15 1). The conformation of the AP2/ERF domain in AtERF96 shows a similar framework to  
16 AtERF100 upon binding to the target DNA (Fig. S2) (Allen et al., 1998). Nevertheless, the  
17 potential propensity of residue-nucleotide interactions shows some differences between these  
18 two structures. For example, residue R31 of AtERF96 (R162 of AtERF100) contacts the  
19 phosphate group of nucleotide G15; at the same structural position, the arginine of AtERF100  
20 binds to the guanine base. Residue R21 of AtERF96 (R152 of AtERF100) contacts  
21 nucleotides T1 and G3 at the 5'-end, but residue R152 of AtERF100 binds to nucleotide G19  
22 closer to the 3'-end of another strand. Residue R39 of AtERF96 (R170 of AtERF100) contacts  
23 three guanines, G6, G15, and G16, instead of the sugar-phosphate backbone of nucleotide C5.  
24 There are two causes for these differences: one is the discrepancy of the polar residues from  
25 the few non-conserved amino acids between these two AP2/ERF domains; the other is the  
26 influence of the neighboring  $\alpha 1$  helix at the N-terminus of AtERF96. The N-terminal  $\alpha 1$  helix

1 interacts with the flanking region following the core sequence of the GCC11 motif at the  
2 minor groove. Interestingly, residue Q3 of the  $\alpha$ 1 helix provides polar interactions with  
3 nearby nucleotides, especially G10 and T14, resulting in unpairing and unstacking of base  
4 pairs from C7 to G16 (Fig. 5C and D). We used the 3DNA suite of programs to analyze the  
5 conformation of DNA base pairs in the residue-binding region. Results indicated that  
6 nucleotides C8, T14, and G15 exhibit shifting, tilting, and rolling (Table S4). Disruption of  
7 base stacking in single-stranded polynucleotides significantly alters the base pair  
8 conformation, leading to a lack of information on the spatial configurations of base pairs  
9 C8-G15 and A9-T14 (Table S5 and S6). The residue-base interaction of R39-G16 combined  
10 with the shifting and twisting of base C7/C8 directly leads to a shear in the base pair C7-G16  
11 (Table S5). Thus, the unpaired and unstacked nucleotides further affect the interaction with  
12 the residues of the  $\beta$ 1– $\beta$ 2 strands at the major groove. This result explains why few conserved  
13 arginines in the AP2/ERF domain of AtERF96 show a binding mode distinct from AtERF100  
14 using target nucleotides. No previous reports indicate that binding of the ethylene-responsive  
15 element binding factors with the GCC box motif results in the unstacking of DNA bases.  
16 Regarding AtERF96 acting as a positive regulator of target gene transcription, we suggest  
17 that binding of the N-terminal  $\alpha$ 1 helix with the 3' flanking region may facilitate DNA  
18 unwinding for further transcription initiation.

19 Mutagenesis coupled with binding experiments confirmed the relevance of the  
20 protein-DNA contacts identified in our structure and helped us delineate the residue  
21 conservation in both the AP2/ERF proteins and the GCC box DNA targets. We analyzed the  
22 binding efficiency of AtERF96 wild-type and various mutants via fluorescence polarization  
23 analysis. We noticed that the interaction of AtERF96-GCC box showed the capacity for both  
24 specific and non-specific binding in our FP analysis. The polarization curve of wild-type  
25 AtERF96 showed a clear trend with two rises, which can be also observed in the results of  
26 R16A, W23A, and R31A mutants. (Fig. 3B, C, F and G). Interestingly, when attempting to

1 analyze the data using the one-site binding equation:  $y = B_{\max} \times x / K_{dHi} + x$ , the data of  
2 wild-type and mutants again were difficult to fit to the sigmoid curve (Fig. S4). However, the  
3 equation can fit the data of R19A, R21A, R39A, W41A, and double mutants (Fig. S4). The  
4 results imply that some residues are crucial for the recognition of the GCC box, and that the  
5 mutations caused the functional loss of specific binding. Among these, R19 and R39 showed  
6 the major influence in the specific binding, due to their interactions with the bases G7, G16,  
7 G17, G19 and G20 in the GCC12 probe (G6, G15, G16, G18 and G19 in the GCC11 probe)  
8 (Fig. 3, Table S7). At the N-terminus of AtERF96, all mutants retained the two-site binding  
9 feature in the raw data (Fig. 4). The ND10 truncated protein showed a limited effect on  
10 specific binding, accompanied by a raised  $K_{dHi}$  level compared to wild-type, suggesting that  
11 the N-terminal region is not involved in GCC box recognition (Fig. 4F). In view of the above,  
12 we suggest that the  $K_{dHi}$  is implicated in the residue-base conservation, whereas the  $K_{dLo}$   
13 reflects the stabilization of residue-sugar phosphate backbone, according to the effects caused  
14 by mutations of conserved residues of their specific functions. To better understand the  
15 impact of AtERF96 mutations *in vivo*, we designed a transactivation analysis in *Arabidopsis*  
16 protoplasts with an overexpressing effector and a luciferase-fused reporter. Although the  
17 N-terminal  $\alpha 1$  helix of AtERF96 made contact with the 5' end of the template strand and  
18 structurally disrupted DNA base pairing, the N-terminal mutants only showed limited  
19 influence on the transactivation analysis (Fig. 5B). These results show that the  $\alpha 1$  helix acts  
20 as an auxiliary domain in promoting transcription initiation. The transactivation assay  
21 revealed that most mutations of conserved arginines in the AP2/ERF domain seriously  
22 disrupted protein-DNA interactions, including the conserved tryptophans W23 and W41 (Fig.  
23 6C). However, we noticed that the sequence region excluding the AP2/ERF domain is highly  
24 diverse in all of group IX members in the AP2/ERF family, meaning that the N-terminal  
25 region of other ERFs are structurally distinct from AtERF96 (Fig. S3). On the other hand, the  
26 EDLL-truncated AtERF96 lost its transactivation function *in vivo*, suggesting that the EDLL

1 motif indeed interacts with the MEDIATOR25 subunit of the eukaryotic Mediator complex  
2 (Çevik et al., 2012). Previous work confirmed that MED25 interacts with the four members  
3 of group IX of the AP2/ERF family, i.e., AtERF92, AtERF93, ORA59, and TDR1/AtERF98.  
4 Interestingly, the  $\alpha 5$  helix of the EDLL motif exhibited a significantly increased B-factor in  
5 the whole structural data, implying that this region probably plays an important role in  
6 attaching to the MED25 subunit (Fig. 6D). Nevertheless, structural studies and mechanistic  
7 insights into MED25 are still needed.

8 In summary, we have shown that AtERF96, an AP2/ERF-family regulator recognizing  
9 the GCC box DNA motif, is an ethylene-responsive transcription factor that directly  
10 modulates the defense-related gene *PDF1.2a*. Our studies of the AtERF96–GCC11 complex  
11 provide a structural framework for AP2/ERF transcription factors, including the binding  
12 capability of the AP2/ERF domain, together with the influence of DNA base-pair opening via  
13 the N-terminal helix of AtERF96.

#### 14 **SUPPLEMENTARY DATA**

15 Supplementary Data are available at The EMBO Journal Online.

#### 16 **ACKNOWLEDGEMENTS**

17 We thank Dr. Laurent Zimmerli for providing the material of *AtERF96* gene construct.  
18 We thank Uni-edit ([www.uni-edit.net](http://www.uni-edit.net)) for editing and proofreading this manuscript. We thank  
19 the technical supports provided by the “Synchrotron Radiation Protein Crystallography  
20 Facility of the National Core Facility Program for Biotechnology, Ministry of Science and  
21 Technology” and the “National Synchrotron Radiation Research Center”, a national user  
22 facility supported by the Ministry of Science and Technology, Taiwan. This work is partly

1 supported by Technology Commons, College of Life Science, National Taiwan University,  
2 Taiwan.

### 3 **FUNDING**

4 Financial supports were from the Taiwan Ministry of Science and Technology (MOST  
5 106-2313-B-002-005) and National Taiwan University (NTUCCP-106R891508) to Yi-Sheng  
6 Cheng.

7 *Conflict of interest statement.* None declared.

### 8 **REFERENCES**

- 9 Adams PD, Afonine PV, Bunkoczi G, Chen VB, Davis IW, Echols N, Headd JJ, Hung LW,  
10 Kapral GJ, Grosse-Kunstleve RW, McCoy AJ, Moriarty NW, Oeffner R, Read RJ, Richardson  
11 DC, Richardson JS, Terwilliger TC, Zwart PH (2010) PHENIX: a comprehensive  
12 Python-based system for macromolecular structure solution. *Acta Crystallogr D Biol*  
13 *Crystallogr* 66: 213-21
- 14 Afonine PV, Grosse-Kunstleve RW, Echols N, Headd JJ, Moriarty NW, Mustyakimov M,  
15 Terwilliger TC, Urzhumtsev A, Zwart PH, Adams PD (2012) Towards automated  
16 crystallographic structure refinement with phenix.refine. *Acta Crystallogr D Biol Crystallogr*  
17 68: 352-67
- 18 Allen MD, Yamasaki K, Ohme-Takagi M, Tateno M, Suzuki M (1998) A novel mode of DNA  
19 recognition by a beta-sheet revealed by the solution structure of the GCC-box binding  
20 domain in complex with DNA. *EMBO J* 17: 5484-96
- 21 Berrocal-Lobo M, Molina A, Solano R (2002) Constitutive expression of  
22 ETHYLENE-RESPONSE-FACTOR1 in Arabidopsis confers resistance to several  
23 necrotrophic fungi. *Plant J* 29: 23-32
- 24 Buttner M, Singh KB (1997) Arabidopsis thaliana ethylene-responsive element binding  
25 protein (AtEBP), an ethylene-inducible, GCC box DNA-binding protein interacts with an ocs  
26 element binding protein. *Proc Natl Acad Sci USA* 94: 5961-6
- 27 Catinot J, Huang JB, Huang PY, Tseng MY, Chen YL, Gu SY, Lo WS, Wang LC, Chen YR,  
28 Zimmerli L (2015) ETHYLENE RESPONSE FACTOR 96 positively regulates Arabidopsis  
29 resistance to necrotrophic pathogens by direct binding to GCC elements of jasmonate - and  
30 ethylene-responsive defence genes. *Plant Cell Environ* 38: 2721-34

- 1 Çevik V, Kidd BN, Zhang P, Hill C, Kiddle S, Denby KJ, Holub EB, Cahill DM, Manners JM,  
2 Peer M, Schenk JB, Kazan K (2012) MEDIATOR25 Acts as an Integrative Hub for the  
3 Regulation of Jasmonate-Responsive Gene Expression in *Arabidopsis*. *Plant Physiol* 160:  
4 541–555
- 5 Checovich WJ, Bolger RE, Burke T (1995) Fluorescence polarization--a new tool for cell and  
6 molecular biology. *Nature* 375: 254-6
- 7 Chen VB, Arendall WB, 3rd, Headd JJ, Keedy DA, Immormino RM, Kapral GJ, Murray LW,  
8 Richardson JS, Richardson DC (2010) MolProbity: all-atom structure validation for  
9 macromolecular crystallography. *Acta Crystallogr D Biol Crystallogr* 66: 12-21
- 10 Ecker JR (1995) The ethylene signal transduction pathway in plants. *Science* 268: 667-75
- 11 Elliott RC, Betzner AS, Huttner E, Oakes MP, Tucker WQ, Gerentes D, Perez P, Smyth DR  
12 (1996) *AINTEGUMENTA*, an *APETALA2*-like gene of *Arabidopsis* with pleiotropic roles in  
13 ovule development and floral organ growth. *Plant Cell* 8: 155–168
- 14 Gu YQ, Wildermuth MC, Chakravarthy S, Loh YT, Yang C, He X, Han Y, Martin GB (2002)  
15 Tomato transcription factors *pti4*, *pti5*, and *pti6* activate defense responses when expressed in  
16 *Arabidopsis*. *Plant Cell* 14: 817-31
- 17 Gutterson N, Reuber TL (2004) Regulation of disease resistance pathways by AP2/ERF  
18 transcription factors. *Curr Opin Plant Biol* 7: 465-71
- 19 Hao D, Ohme-Takagi M, Sarai A (1998) Unique mode of GCC box recognition by the  
20 DNA-binding domain of ethylene-responsive element-binding factor (ERF domain) in plant.  
21 *J Biol Chem* 273: 26857-61
- 22 Hao D, Yamasaki K, Sarai A, Ohme-Takagi M (2002) Determinants in the sequence specific  
23 binding of two plant transcription factors, CBF1 and NtERF2, to the DRE and GCC motifs.  
24 *Biochemistry* 41: 4202-8
- 25 Heyduk T, Ma Y, Tang H, Ebright RH (1996) Fluorescence anisotropy: rapid, quantitative  
26 assay for protein-DNA and protein-protein interaction. *Methods Enzymol* 274: 492-503
- 27 Hu YX, Wang YH, Liu XF, Li JY (2004) *Arabidopsis* RAV1 is down-regulated by  
28 brassinosteroid and may act as a negative regulator during plant development. *Cell Res* 14: 8–  
29 15
- 30 Jofuku KD, den Boer BG, Van Montagu M, Okamoto JK (1994) Control of *Arabidopsis*  
31 flower and seed development by the homeotic gene *APETALA2*. *Plant Cell* 6: 1211-25
- 32 Kazan K (2015) Diverse roles of jasmonates and ethylene in abiotic stress tolerance. *Trends*  
33 *Plant Sci* 20: 219-29
- 34 Lee S-j, Park JH, Lee MH, Yu J-h, Kim SY (2010) Isolation and functional characterization  
35 of CE1 binding proteins. *BMC Plant Biol* 10: 277
- 36 Liu Q, Kasuga M, Sakuma Y, Abe H, Miura S, Yamaguchi-Shinozaki K, Shinozaki K (1998)  
37 Two transcription factors, DREB1 and DREB2, with an EREBP/AP2 DNA binding domain  
38 separate two cellular signal transduction pathways in drought- and



- 1 low-temperature-responsive gene expression, respectively, in Arabidopsis. *Plant Cell* 10:  
2 1391-406
- 3 McCoy AJ, Grosse-Kunstleve RW, Adams PD, Winn MD, Storoni LC, Read RJ (2007)  
4 Phaser crystallographic software. *J Appl Crystallogr* 40: 658-674
- 5 McPhillips TM, McPhillips SE, Chiu HJ, Cohen AE, Deacon AM, Ellis PJ, Garman E,  
6 Gonzalez A, Sauter NK, Phizackerley RP, Soltis SM, Kuhn P (2002) Blu-Ice and the  
7 Distributed Control System: software for data acquisition and instrument control at  
8 macromolecular crystallography beamlines. *J Synchrotron Radiat* 9: 401-6
- 9 Mizoi J, Shinozaki K, Yamaguchi-Shinozaki K (2012a) AP2/ERF family transcription factors  
10 in plant abiotic stress responses. *Biochim Biophys Acta* 1819: 86-96
- 11 Mizoi J, Shinozaki K, Yamaguchi-Shinozaki K (2012b) AP2/ERF family transcription factors  
12 in plant abiotic stress responses. *Biochim Biophys Acta* 1819: 86-96
- 13 Moerke NJ (2009) Fluorescence Polarization (FP) Assays for Monitoring Peptide-Protein or  
14 Nucleic Acid-Protein Binding. *Curr Protoc Chem Biol* 1: 1-15
- 15 Murshudov GN, Skubak P, Lebedev AA, Pannu NS, Steiner RA, Nicholls RA, Winn MD,  
16 Long F, Vagin AA (2011) REFMAC5 for the refinement of macromolecular crystal structures.  
17 *Acta Crystallogr D Biol Crystallogr* 67: 355-67
- 18 Nakano T, Suzuki K, Fujimura T, Shinshi H (2006) Genome-wide analysis of the ERF gene  
19 family in Arabidopsis and rice. *Plant Physiol* 140: 411-32
- 20 Novillo F, Medina J, Salinas J (2007) Arabidopsis CBF1 and CBF3 have a different function  
21 than CBF2 in cold acclimation and define different gene classes in the CBF regulon. *Proc*  
22 *Natl Acad Sci USA* 104: 21002-7
- 23 Ohme-Takagi M, Shinshi H (1995) Ethylene-inducible DNA binding proteins that interact  
24 with an ethylene-responsive element. *Plant Cell* 7: 173-82
- 25 Onate-Sanchez L, Anderson JP, Young J, Singh KB (2007) AtERF14, a member of the ERF  
26 family of transcription factors, plays a nonredundant role in plant defense. *Plant Physiol* 143:  
27 400-9
- 28 Otwinowski Z, Minor W (1997) Processing of X-ray diffraction data collected in oscillation  
29 mode. *Methods Enzymol* 276: 307-26
- 30 Penninckx IA, Eggermont K, Terras FR, Thomma BP, De Samblanx GW, Buchala A,  
31 Metraux JP, Manners JM, Broekaert WF (1996) Pathogen-induced systemic activation of a  
32 plant defensin gene in Arabidopsis follows a salicylic acid-independent pathway. *Plant Cell* 8:  
33 2309-23
- 34 Penninckx IA, Thomma BP, Buchala A, Metraux JP, Broekaert WF (1998) Concomitant  
35 activation of jasmonate and ethylene response pathways is required for induction of a plant  
36 defensin gene in Arabidopsis. *Plant Cell* 10: 2103-13
- 37 Pre M, Atallah M, Champion A, De Vos M, Pieterse CM, Memelink J (2008) The AP2/ERF  
38 domain transcription factor ORA59 integrates jasmonic acid and ethylene signals in plant

- 1 defense. *Plant Physiol* 147: 1347-57
- 2 Sessa G, Meller Y, Fluhr R (1995) A GCC element and a G-box motif participate in  
3 ethylene-induced expression of the PRB-1b gene. *Plant Mol Biol* 28: 145-53
- 4 Shinshi H, Usami S, Ohme-Takagi M (1995) Identification of an ethylene-responsive region  
5 in the promoter of a tobacco class I chitinase gene. *Plant Mol Biol* 27: 923-932
- 6 Tiwari SB, Belachew A, Ma SF, Young M, Ade J, Shen Y, Marion CM, Holtan HE, Bailey A,  
7 Stone JK, Edwards L, Wallace AD, Canales RD, Adam L, Ratcliffe OJ, Repetti PP (2012)  
8 The EDLL motif: a potent plant transcriptional activation domain from AP2/ERF  
9 transcription factors. *Plant J* 70: 855-65
- 10 Winn MD, Ballard CC, Cowtan KD, Dodson EJ, Emsley P, Evans PR, Keegan RM, Krissinel  
11 EB, Leslie AG, McCoy A, McNicholas SJ, Murshudov GN, Pannu NS, Potterton EA, Powell  
12 HR, Read RJ, Vagin A, Wilson KS (2011) Overview of the CCP4 suite and current  
13 developments. *Acta Crystallogr D Biol Crystallogr* 67: 235-42
- 14 Xu P, Narasimhan ML, Samson T, Coca MA, Huh GH, Zhou J, Martin GB, Hasegawa PM,  
15 Bressan RA (1998) A nitrilase-like protein interacts with GCC box DNA-binding proteins  
16 involved in ethylene and defense responses. *Plant Physiol* 118: 867-74
- 17 Yoo SD, Cho YH, Sheen J (2007) Arabidopsis mesophyll protoplasts: a versatile cell system  
18 for transient gene expression analysis. *Nat Protoc* 2: 1565-72
- 19 Zander M, Thurow C, Gatz C (2014) TGA Transcription Factors Activate the Salicylic  
20 Acid-Suppressible Branch of the Ethylene-Induced Defense Program by Regulating ORA59  
21 Expression. *Plant Physiol* 165: 1671-1683
- 22 Zhang H, Huang L, Dai Y, Liu S, Hong Y, Tian L, Huang L, Cao Z, Li D, Song F (2015)  
23 Arabidopsis AtERF15 positively regulates immunity against *Pseudomonas syringae* pv.  
24 tomato DC3000 and *Botrytis cinerea*. *Front Plant Sci* 6: 686
- 25 Zheng G, Lu XJ, Olson WK (2009) Web 3DNA--a web server for the analysis, reconstruction,  
26 and visualization of three-dimensional nucleic-acid structures. *Nucleic Acids Res* 37: W240-6  
27

## 1 **FIGURE LEGENDS**

2 **Figure 1.** Characterization and crystal structure of the AtERF96–GCC box complex. (A)

3 SEC traces of the AtERF96 protein, GCC12 probe, and AtERF96–GCC12 complex are  
4 shown as orange, gray, and blue lines. (B) EMSA binding analysis of AtERF96 proteins with  
5 various GCC probes. (C) Ribbon representation of crystal structure of the AtERF96–GCC11  
6 complex. The N-terminal binding region, AP2/ERF domain, and C-terminal EDLL motif are  
7 colored in green, red, and yellow.

8

9 **Figure 2.** Insights into the interaction of the AtERF96–GCC11 complex. (A) Surface

10 representation of electrostatic potential (left) and sequence conservation (right) of the

11 AtERF96–GCC11 complex. The positively and negatively charged residues are indicated as

12 blue and red color on the electrostatic model. The conserved and non-conserved residues are

13 indicated as crimson and blue-green color on the sequence conservation model. (B) Zoom-in

14 view of the interaction interface of AtERF96–GCC11 complex. Residues of the AP2/ERF

15 domain, the N-terminal region, and the others interact with DNA are shown as red, green, and

16 grey sticks, respectively. The binding nucleotides are represented as white sticks. (C–F)

17 Zoom-in view of the interaction interface of AtERF96–GCC11 complex. (C) Ionic interaction

18 of AtERF96 residues R16, R31, R39 with nucleotides G6, G15, G16 are shown as sticks. (D)

19 Ionic interaction of AtERF96 residues R19, R21 with nucleotides T1, G3, G18, G19 are

20 shown as sticks. (E) Aromatic interaction of AtERF96 residues W23 and W41 with

21 nucleotides T1, G3, and C4. (F) Ionic interaction of AtERF96 residues D2, Q3 and R6 with

22 nucleotides G10, C11 and T14. The conserved residues of the AP2/ERF domain are shown as

23 red sticks, and the N-terminal binding residues are shown as green sticks. The binding

24 nucleotides are represented as cyan sticks. Dashed yellow lines indicate a potential

25 interaction network with bond lengths, and water molecules are shown as a red sphere.

26

1 **Figure 3.** Fluorescence polarization analysis in the AP2/ERF domain of the AtERF96 protein.

2 (A) Schematic diagram of the interaction network between AtERF96 protein and GCC12  
3 DNA probe. The critical residues for protein-DNA interaction at the AP2/ERF domain are  
4 indicated. (B-K) Binding curves of the AtERF96 wild-type (B), R16A (C), R19A (D), R21A  
5 (E), W23A (F), R31A (G), R39A (H), W41A (I), R19A/R21A (J), and R31A/R39A (K)  
6 proteins with the GCC12 DNA probes. All data are representative of three independent  
7 experiments with the two-site binding equation, and the error is calculated as the standard  
8 deviation.

9

10 **Figure 4.** Fluorescence polarization analysis in the N-terminus of the AtERF96 protein. (A)  
11 Schematic diagram of the residues-nucleotides binding in the N-terminus of AtERF96 are  
12 shown. (B-F) Binding curves of the AtERF96 D2A (B), Q3A (C), R6A (D), D2A/Q3A/R6A  
13 (E), and the N-terminal truncation (ND10) (F) proteins with the GCC12 DNA probes. All  
14 data are representative of three independent experiments with the two-site binding equation,  
15 and the error is calculated as the standard deviation.

16

17 **Figure 5.** Conformational change of the DNA template strand by the binding of an  
18 N-terminal  $\alpha 1$  helix in AtERF96. (A) Ribbon representation of the structural superposition of  
19 AtERF100-bound GCC11 DNA motif (yellow) and AtERF96-bound GCC11 DNA motif  
20 (green). (B) Zoom-in view of the base pairs of the superimposed AtERF100-bound GCC11  
21 DNA motif (yellow) and AtERF96-bound GCC11 DNA motif (green) are shown as sticks. (C  
22 and D) Electron density map at the 5' end of template strand in the AtERF96-bound GCC  
23 box motif. Minor groove (C) and major groove (D) views of the GCC11 DNA motif with  
24 nucleotides C7 to G16 from the structure of AtERF96-GCC11 complex are contoured at the  
25  $1.5 \sigma$  of  $2 F_o - F_c$  map.

26

1 **Figure 6.** Transient expression assay and EDLL motif of AtERF96. (A) Schematic diagram  
2 of the reporter and effector plasmids used in transient assays. Effector plasmids were under  
3 the control of the cauliflower mosaic virus (CaMV) 35S promoter. The plasmids constructed  
4 with the Arabidopsis *PDF1.2a* promoter, which contains the two GCC boxes, were fused to a  
5 firefly luciferase gene as the reporter. HA tag, human influenza hemagglutinin tag. 35S ter,  
6 CaMV 35S terminator. Nos, the terminator signal of the gene for nopaline synthase. (B and  
7 C) Relative LUC activity from transient expression analysis of *PDF1.2a* promoter  
8 co-infiltrated with a plasmid containing AtERF96 genes fused to the 35S promoter. Plots of  
9 the LUC activity level influenced by AtERF96 genes with the mutations of N-terminal region  
10 (B) or AP2/ERF domain region (C) are shown, and the ERF9 is a negative control. EV,  
11 empty vector; WT, wild type; double, D2A/Q3A double mutations; triple, D2A/Q3A/R6A  
12 triple mutations; ND10, N-terminal deletion of first 10 residues; dEDLL, C-terminal deletion  
13 of the residues R102 to K131. Multiple comparisons of group vectors were performed using  
14 Fisher's least-significant-difference (LSD) procedure. (D) Crystallographic B-factor  
15 distribution of the AtERF96–GCC11 complex. The residues of relatively higher B-factor  
16 are highlighted from high to low values as red > orange > yellow colors. (E) Ribbon  
17 representation and sequence logo of the AtERF96 EDLL motif. The designated EDLL region  
18 and conserved residues are indicated as yellow ribbons and cyan sticks. Sequence logo of the  
19 EDLL motif is shown through the full-length alignment of the paralogues from AtERF95 to  
20 AtERF98. The bit score indicates the information content for each position in the sequence.

21

22 **Figure 7.** Characterization of binding ability between AtERF96 proteins and various DNA  
23 motifs. (A) EMSA binding analysis of AtERF96 proteins with the GCC12, P box, CS1 box,  
24 and DRE box probes. (B-D) Fluorescence polarization analysis of AtERF96 proteins with the  
25 P box (B), CS1 box (C), and DRE box (D) DNA probes. All data are representative of three  
26 independent experiments with the two-site binding equation, and the error is calculated as the

1 standard deviation.

2

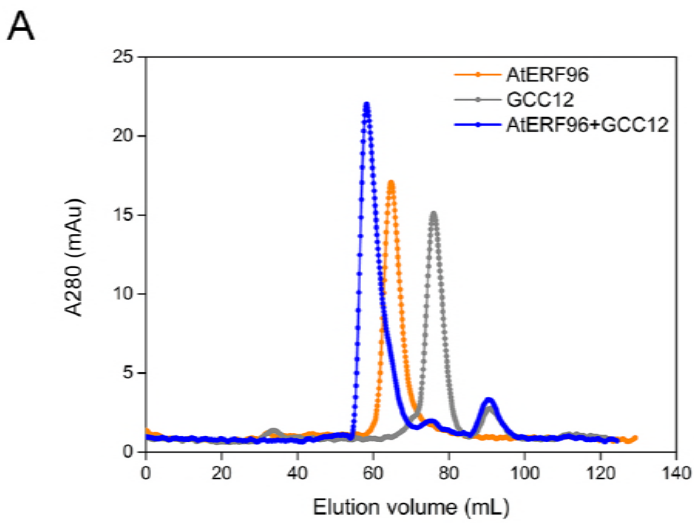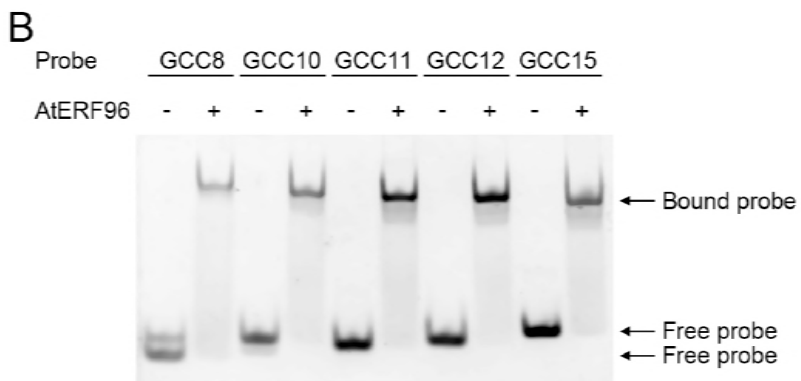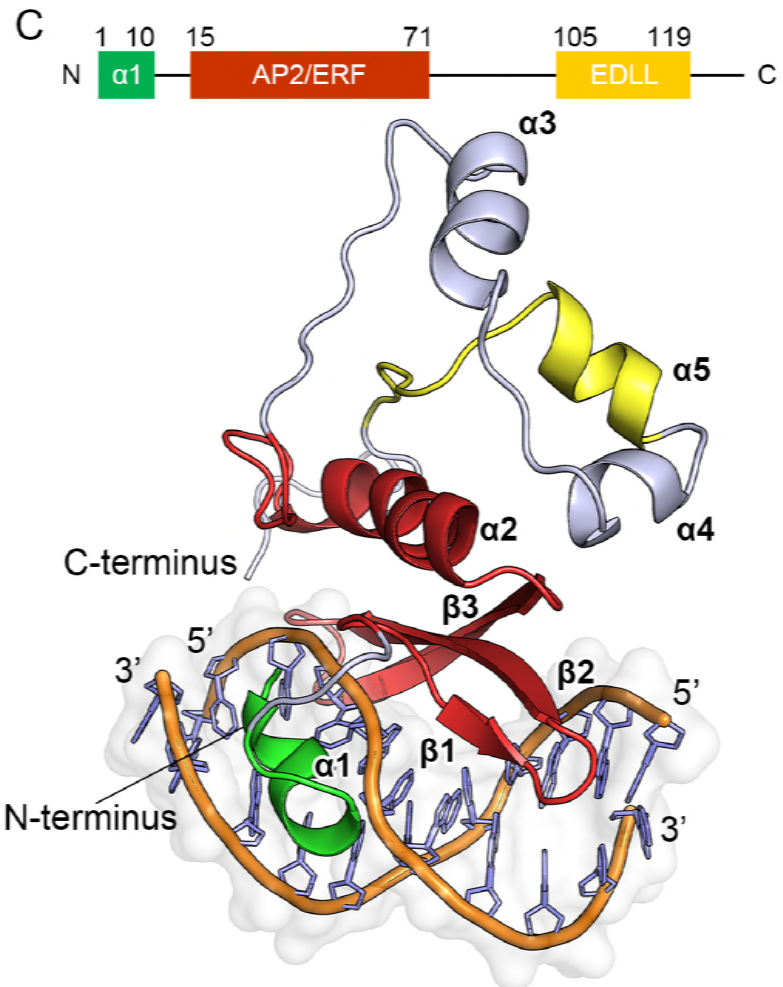

**A** ■ Positively charged residues  
■ Negatively charged residues

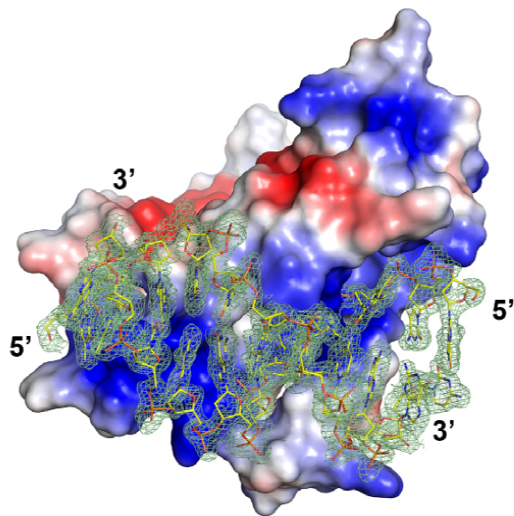

■ Conserved residues  
■ Non-conserved residues

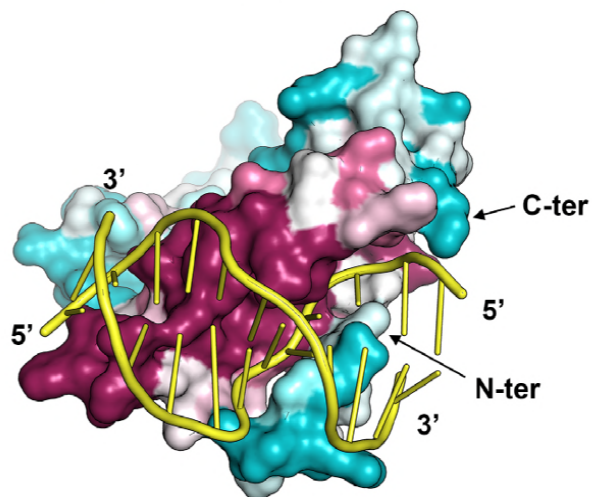

**B**

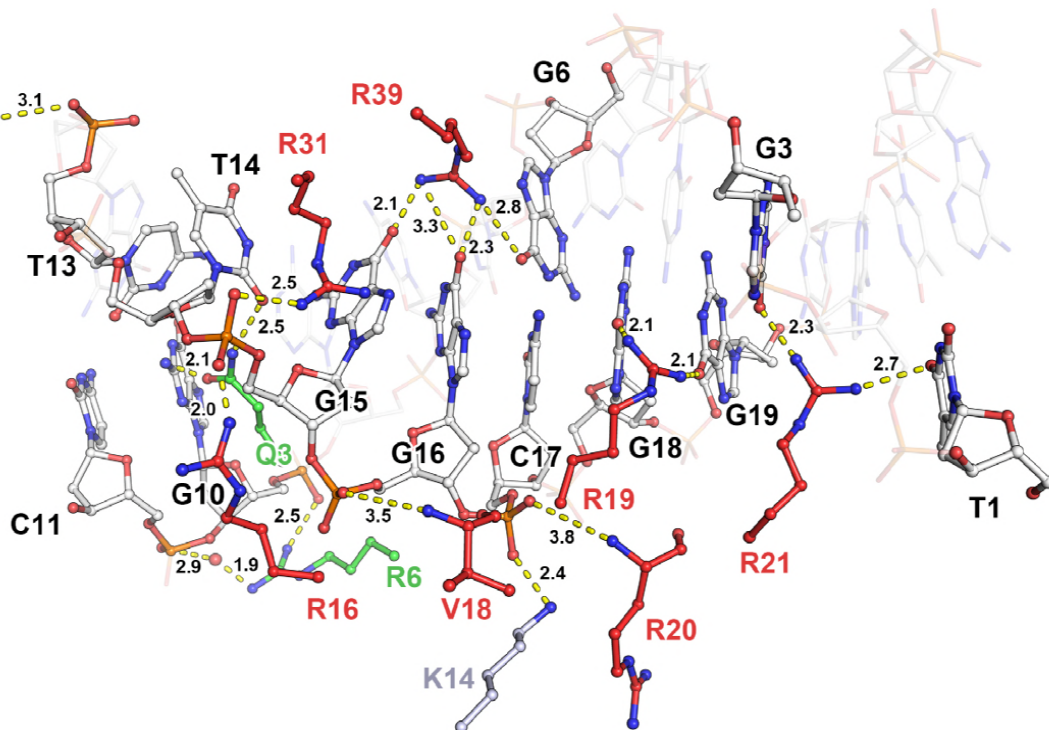

**C**

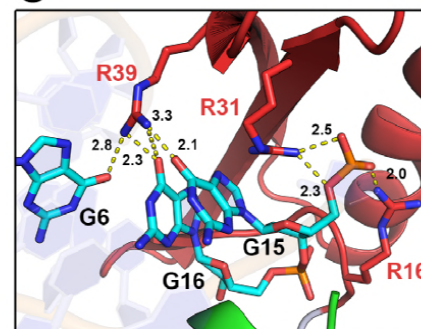

**D**

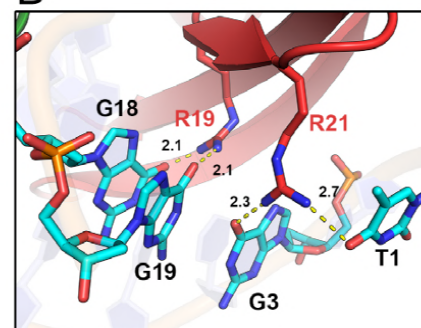

**E**

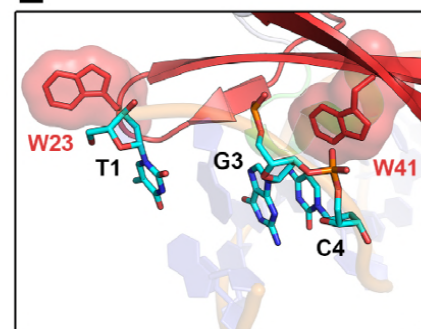

**F**

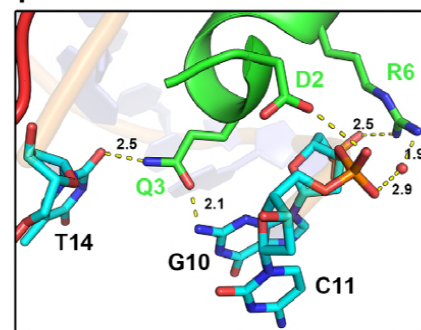



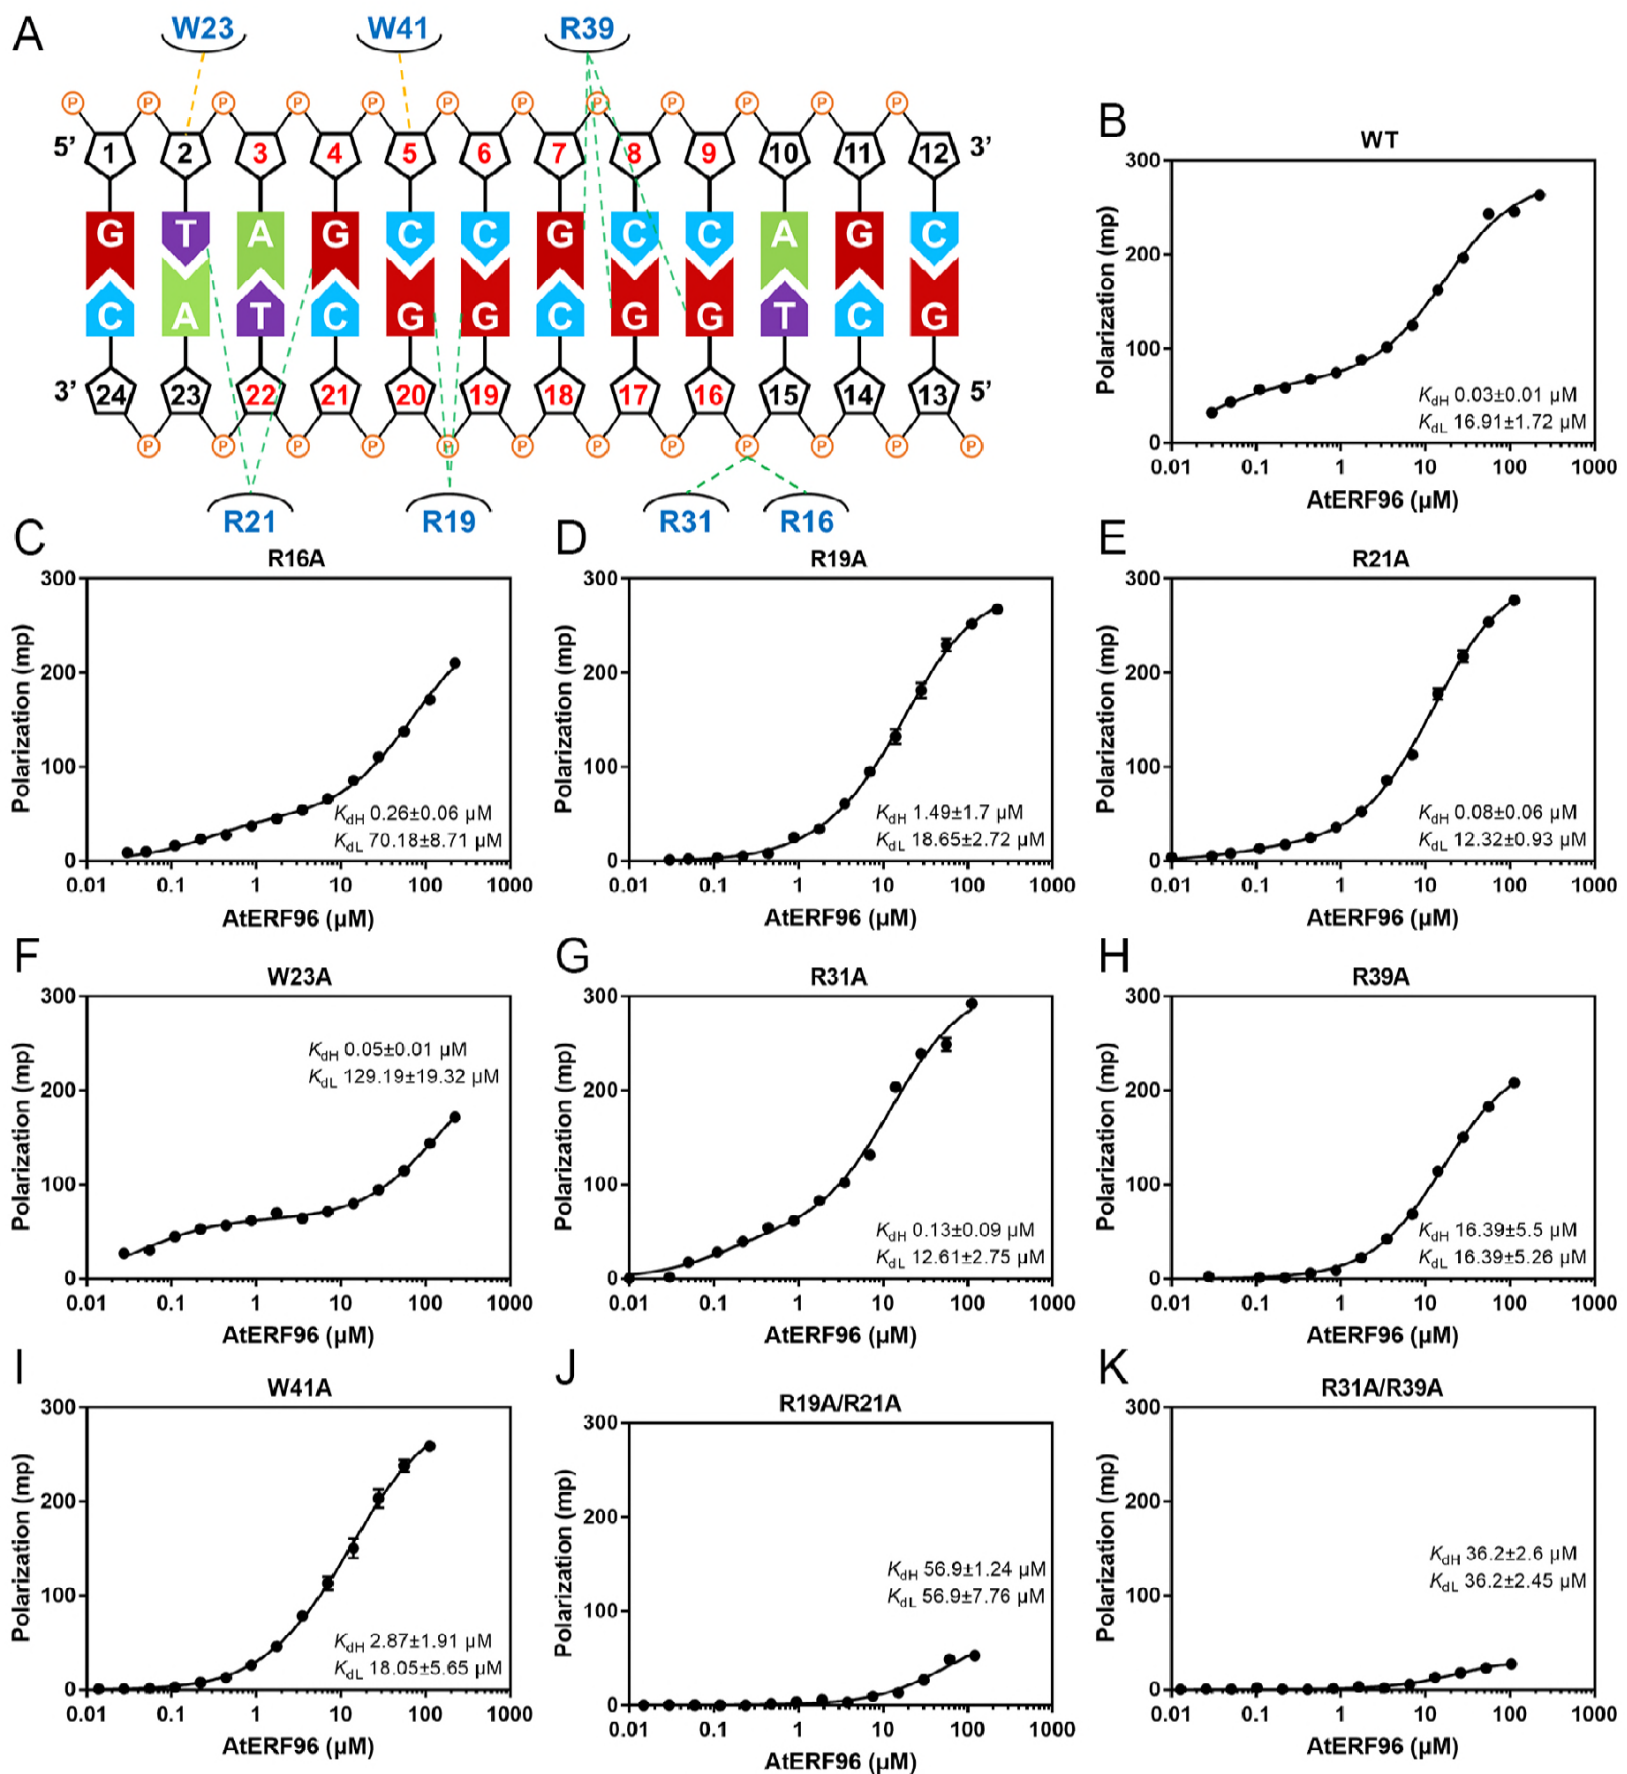

A

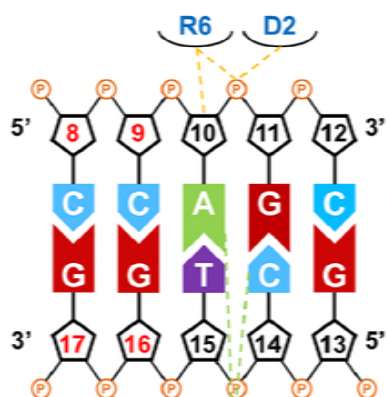

B

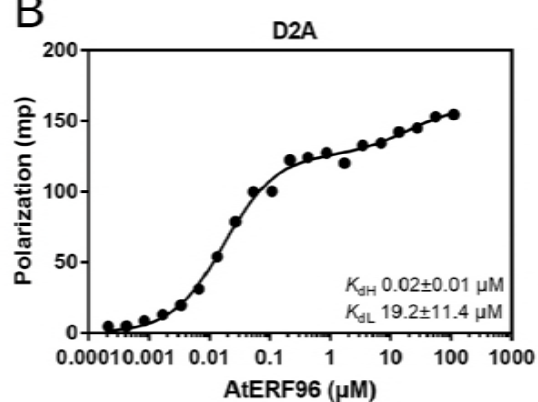

C

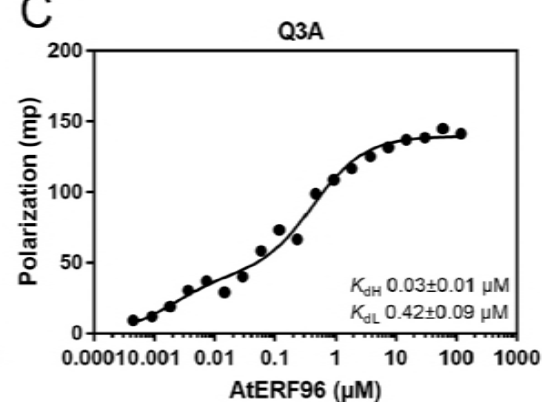

D

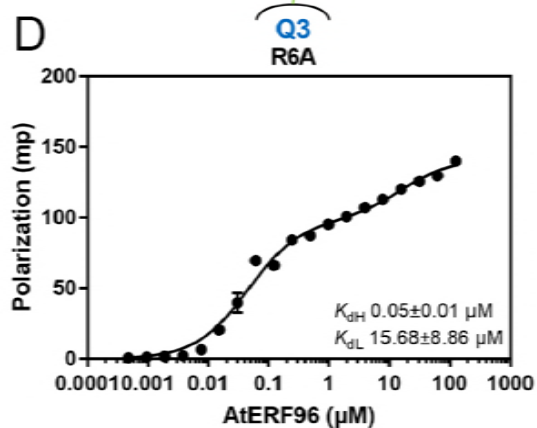

E

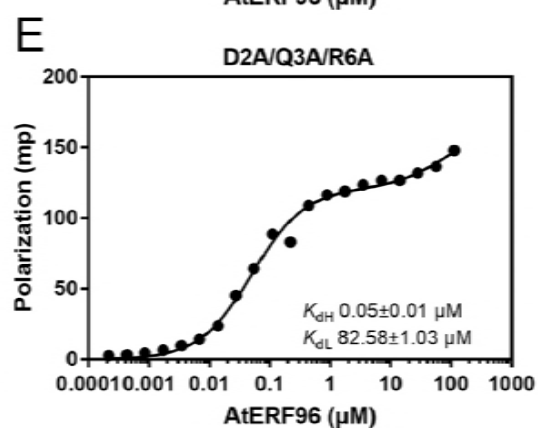

F

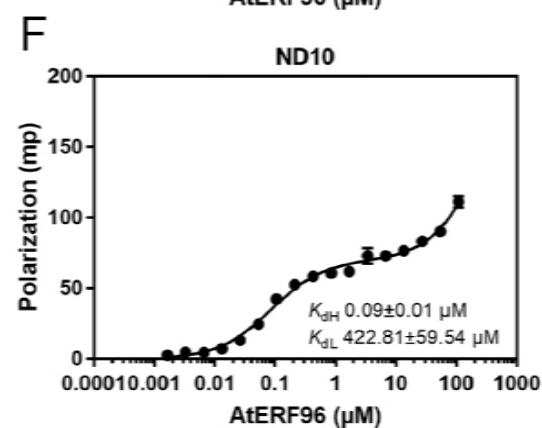

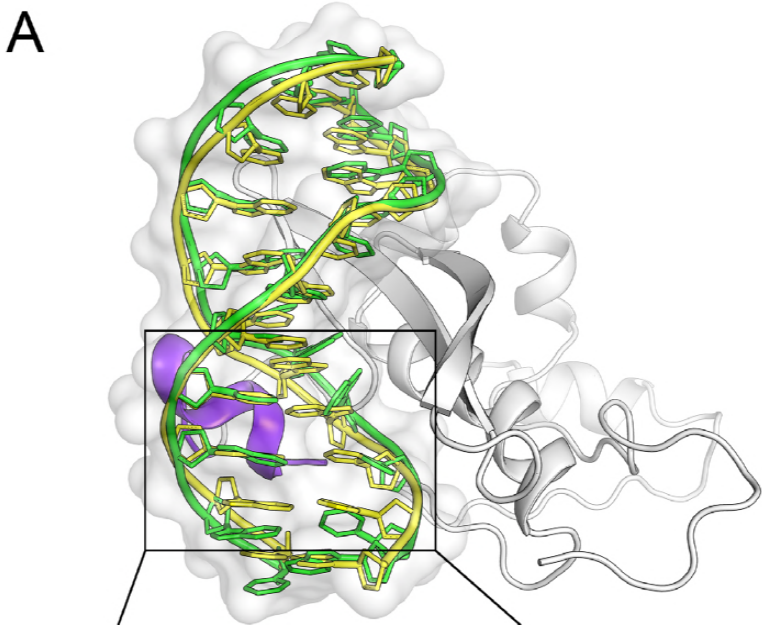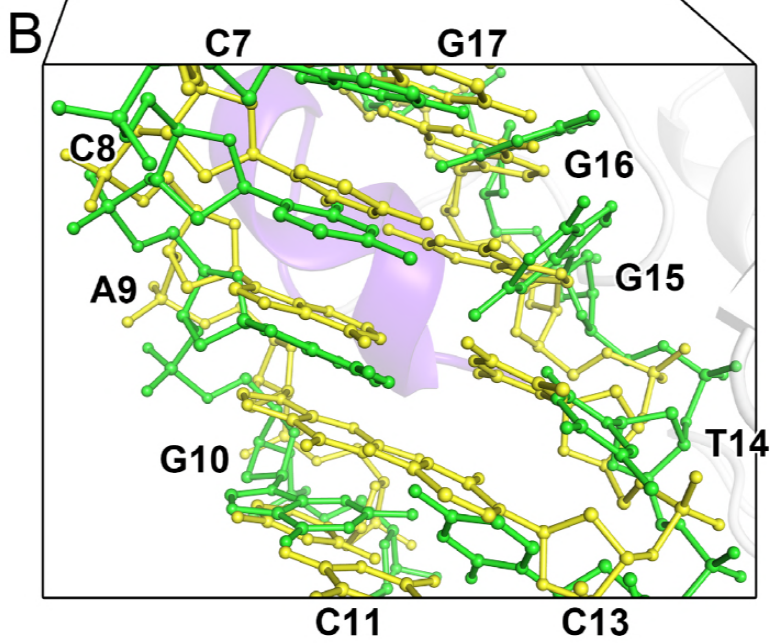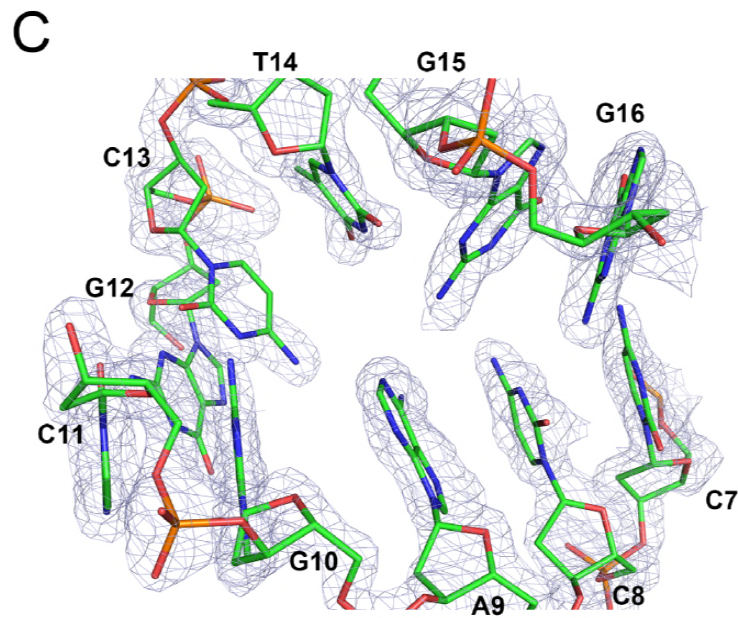

180°

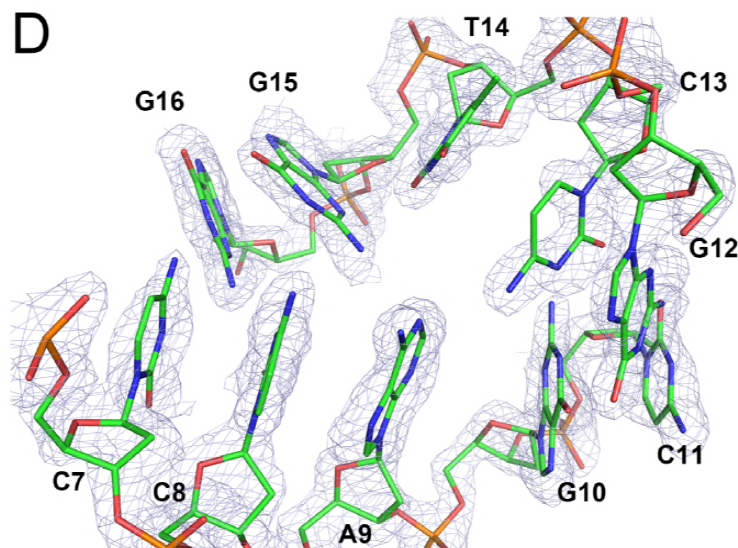

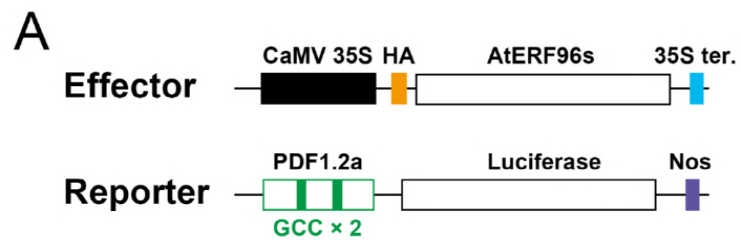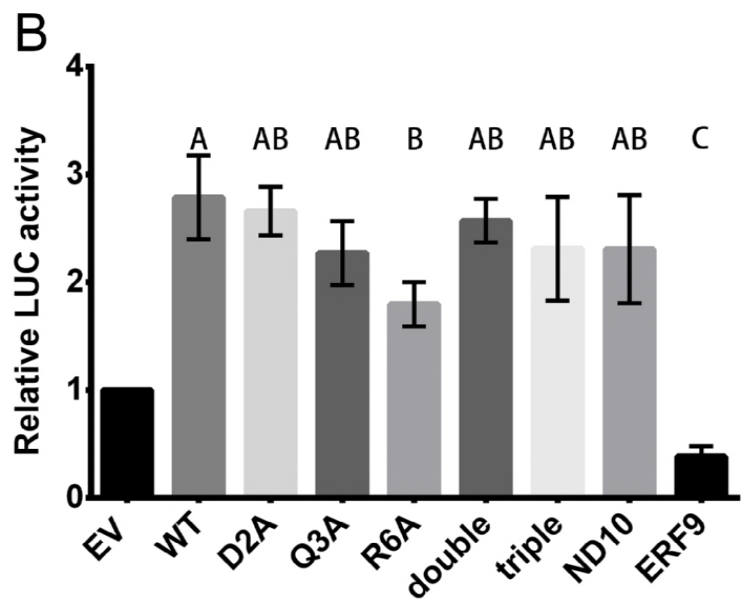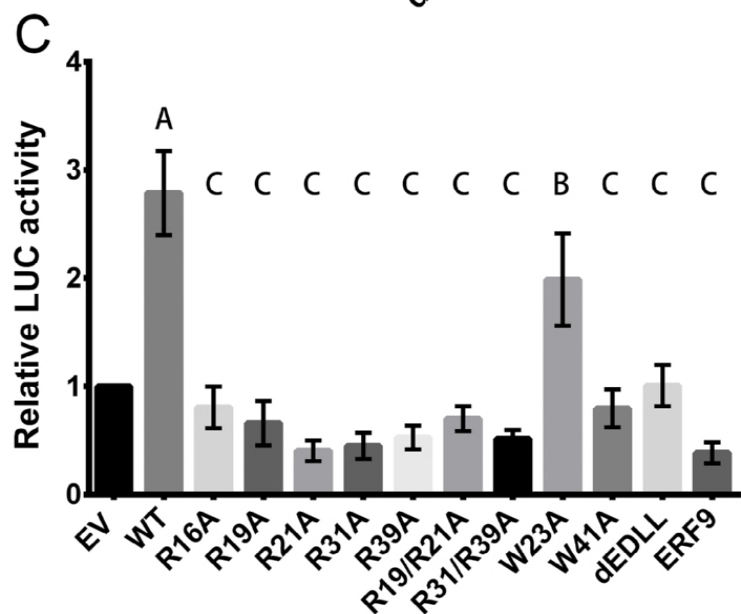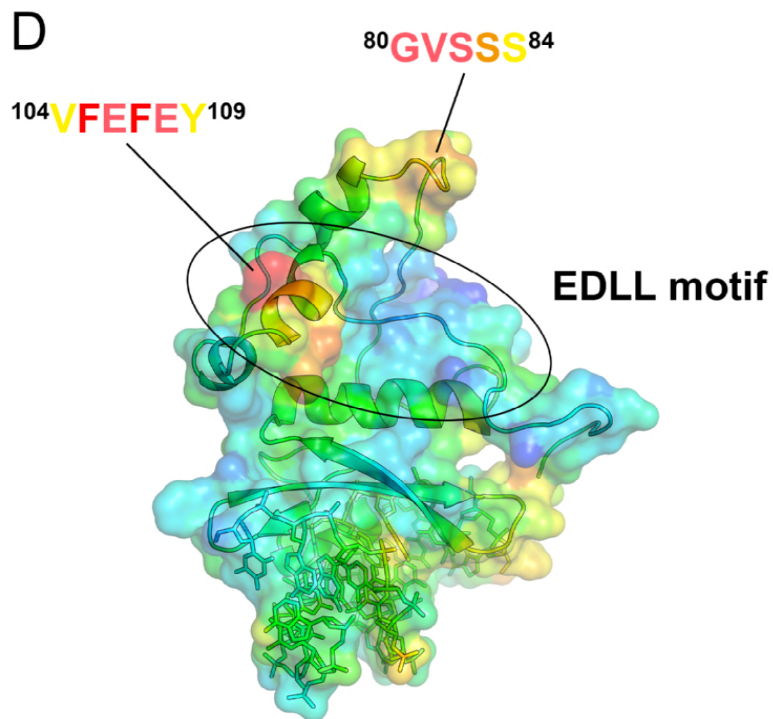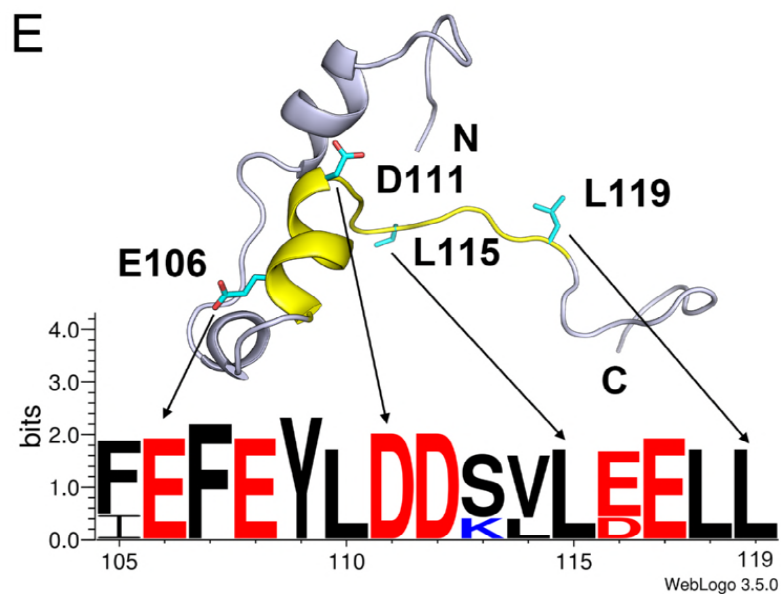

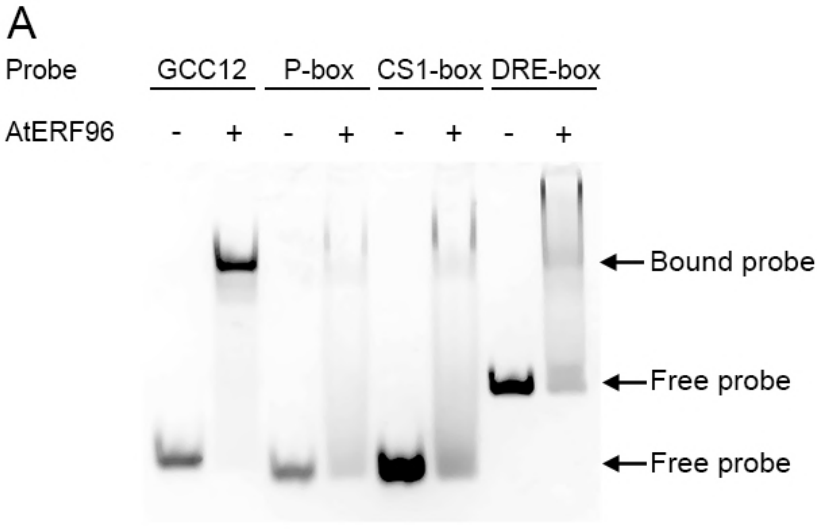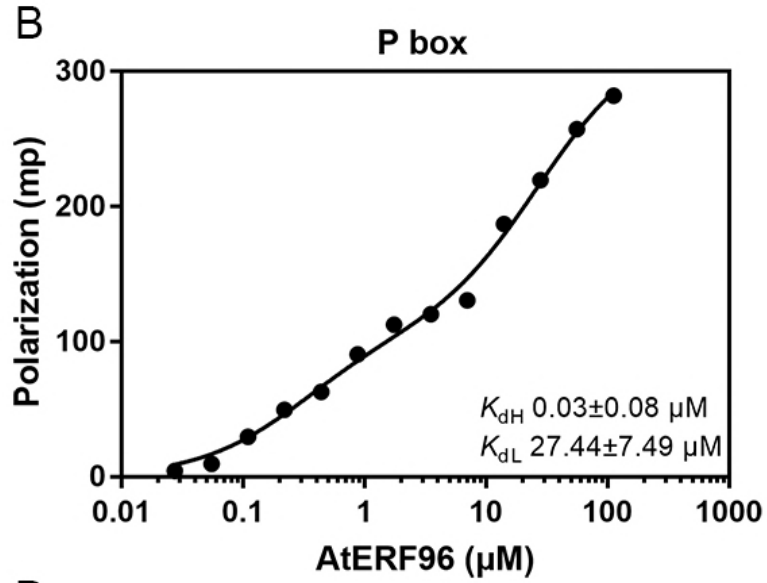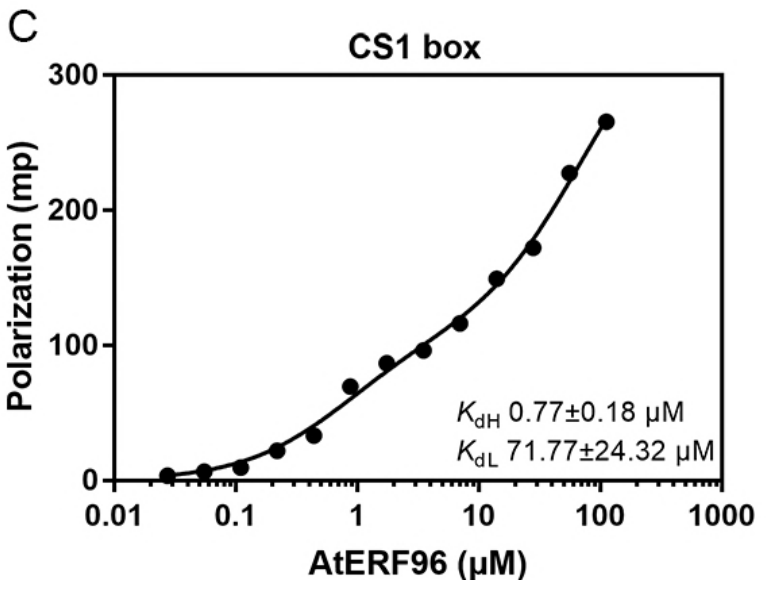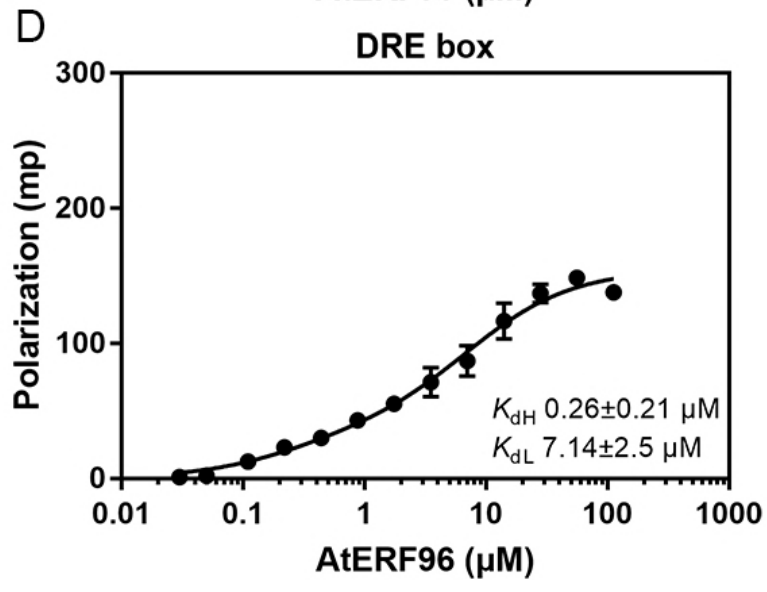

**Table 1. Data collection and refinement statistics (molecular replacement)**

| AtERF96–GCC-box                          |                        |
|------------------------------------------|------------------------|
| <b>Data collection</b>                   |                        |
| Space group                              | P 1 2 <sub>1</sub> 1   |
| Beamline                                 | BL13C1, NSRRC          |
| Wavelength (Å)                           | 0.97622                |
| Cell dimensions                          |                        |
| <i>a</i> , <i>b</i> , <i>c</i> (Å)       | 39, 81.2, 39           |
| $\alpha$ , $\beta$ , $\gamma$ (°)        | 90, 120, 90            |
| Resolution (Å)                           | 50-1.76 (1.83-1.76)*   |
| Total reflections                        | 67975 (7034)           |
| Unique reflections                       | 19986 (1986)           |
| Mean I/sigma(I)                          | 10.45 (4.04)           |
| Multiplicity                             | 3.4 (3.5)              |
| Completeness (%)                         | 97.3 (98.9)            |
| Wilson B-factor (Å <sup>2</sup> )        | 9.30                   |
| R-meas (%)                               | 6.22                   |
| R-merge (%)                              | 5.17 (34.2)            |
| CC(1/2)                                  | 99.7 (86.6)            |
| <b>Refinement</b>                        |                        |
| Resolution (Å)                           | 21.1-1.76 (1.83-1.76)* |
| R <sub>work</sub> /R <sub>free</sub> (%) | 20.7/22.7              |
| Reflections (work/test)                  | 17966/2003             |
| No. atoms                                |                        |
| Protein                                  | 1008                   |
| DNA                                      | 445                    |
| Water                                    | 338                    |
| R.m.s deviations                         |                        |
| Bond lengths (Å)                         | 0.014                  |
| Bond angles (°)                          | 1.772                  |
| Ramachandran plot (%)                    |                        |
| Favored, allowed, outliers               | 91.5, 3.8, 4.7         |
| B-factor (Å <sup>2</sup> )               |                        |
| Average                                  | 19.18                  |
| Protein                                  | 19.51                  |
| DNA                                      | 20.19                  |
| Water                                    | 16.87                  |

\*Values in parentheses are for the highest-resolution shell.
